# Supplementary material for: Establishing a core outcome set for treatment of uncomplicated appendicitis in children: study protocol for an international Delphi survey
Source: PubMed Central journal article supplement (PMC6538019; doi:10.1136/bmjopen-2018-028861), 2019-05-22
Supplement: bmjopen-2018-028861.draft_revisions.pdf [file bmjopen-2018-028861.draft_revisions.pdf]

# BMJ Open

BMJ Open is committed to open peer review. As part of this commitment we make the peer review history of every article we publish publicly available.

When an article is published we post the peer reviewers' comments and the authors' responses online. We also post the versions of the paper that were used during peer review. These are the versions that the peer review comments apply to.

The versions of the paper that follow are the versions that were submitted during the peer review process. They are not the versions of record or the final published versions. They should not be cited or distributed as the published version of this manuscript.

BMJ Open is an open access journal and the full, final, typeset and author-corrected version of record of the manuscript is available on our site with no access controls, subscription charges or pay-per-view fees (<http://bmjopen.bmj.com>).

If you have any questions on BMJ Open's open peer review process please email [editorial.bmjopen@bmj.com](mailto:editorial.bmjopen@bmj.com)

# BMJ Open

## Establishing a core outcome set for treatment of uncomplicated appendicitis in children: study protocol for a systematic review and international Delphi survey

|                               |                                                                                                                                                                                                                                                                                                                                                                                                                                                                                                                                                                                                                                                                                                                                                                                                                                                                                                                                                                                                             |
|-------------------------------|-------------------------------------------------------------------------------------------------------------------------------------------------------------------------------------------------------------------------------------------------------------------------------------------------------------------------------------------------------------------------------------------------------------------------------------------------------------------------------------------------------------------------------------------------------------------------------------------------------------------------------------------------------------------------------------------------------------------------------------------------------------------------------------------------------------------------------------------------------------------------------------------------------------------------------------------------------------------------------------------------------------|
| Journal:                      | <i>BMJ Open</i>                                                                                                                                                                                                                                                                                                                                                                                                                                                                                                                                                                                                                                                                                                                                                                                                                                                                                                                                                                                             |
| Manuscript ID                 | bmjopen-2018-028861                                                                                                                                                                                                                                                                                                                                                                                                                                                                                                                                                                                                                                                                                                                                                                                                                                                                                                                                                                                         |
| Article Type:                 | Protocol                                                                                                                                                                                                                                                                                                                                                                                                                                                                                                                                                                                                                                                                                                                                                                                                                                                                                                                                                                                                    |
| Date Submitted by the Author: | 28-Dec-2018                                                                                                                                                                                                                                                                                                                                                                                                                                                                                                                                                                                                                                                                                                                                                                                                                                                                                                                                                                                                 |
| Complete List of Authors:     | Knaapen, Max; Emma Children's Hospital, Amsterdam UMC, University of Amsterdam, Vrije Universiteit, Paediatric Surgical Centre<br>Hall, Nigel; University of Southampton Faculty of Medicine, University Surgery Unit<br>van der Lee, Johanna H.; Emma Children's Hospital, Amsterdam UMC, University of Amsterdam, Paediatric clinical Research Office<br>Butcher, Nancy; Sick Kids, Child Health Evaluative Sciences<br>Offringa, Martin; The Hospital for Sick Children, University of Toronto, Department of Paediatrics<br>Van Heurn, Ernst; Emma Children's Hospital, Amsterdam UMC, University of Amsterdam, Vrije Universiteit, Paediatric Surgical Centre<br>Bakx, Roel; Emma Children's Hospital, Amsterdam UMC, University of Amsterdam, Vrije Universiteit, Paediatric Surgical Centre<br>Gorter, Ramon; Emma Children's Hospital, Amsterdam UMC, University of Amsterdam, Vrije Universiteit, Paediatric Surgical Centre<br>+ On behalf of the paediatric , appendicitis COS development group |
| Keywords:                     | delphi, appendicitis, children, core outcome set, paediatric, Global                                                                                                                                                                                                                                                                                                                                                                                                                                                                                                                                                                                                                                                                                                                                                                                                                                                                                                                                        |
|                               |                                                                                                                                                                                                                                                                                                                                                                                                                                                                                                                                                                                                                                                                                                                                                                                                                                                                                                                                                                                                             |

SCHOLARONE™  
Manuscripts

1  
2  
3  
4  
5  
6  
7  
8  
9  
10  
11  
12  
13  
14  
15  
16  
17  
18  
19  
20  
21  
22  
23  
24  
25  
26  
27  
28  
29  
30  
31  
32  
33  
34  
35  
36  
37  
38  
39  
40  
41  
42  
43  
44  
45  
46  
47  
48  
49  
50  
51  
52  
53  
54  
55  
56  
57  
58  
59  
60

# 1 Establishing a core outcome set for treatment of uncomplicated 2 appendicitis in children: study protocol for a systematic review and 3 international Delphi survey. 4

5 Knaapen M, MD<sup>1</sup>, Hall NJ, MD, PhD<sup>2</sup>, Van der Lee JH, MD, PhD<sup>3</sup>, Butcher NJ, PhD<sup>4</sup>,  
6 Offringa M, MD, PhD<sup>4, 5</sup>, van Heurn LWE, MD, PhD<sup>1</sup>, Bakx R, MD, PhD<sup>1</sup>, Gorter RR, MD,  
7 PhD<sup>1</sup> + On behalf of the paediatric appendicitis COS development group.

8 Minneci PC, MD, Svensson JF, MD, PhD, Luks FI, MD, PhD, St. Peter SD, MD, Abbo O, MD,  
9 Arnaud AP, MD, Adams S, MBBS, FRACS, Nah SA, MBBS, MRCS, Skarsgard ED, MD,  
10 Pierro A, MD, PhD, Emil S, MD, CM, Keijzer R, MD, PhD, Suominen JS, MD, PhD, Aziz DA,  
11 MD, FRCS

- 12  
13  
14  
15  
16  
17  
18  
19  
20  
21  
22  
23  
24  
25  
26  
27  
28  
29  
30  
31  
32  
33  
34  
35  
36  
37  
38  
39  
40  
41  
42  
43  
44  
45  
46  
47  
48  
49  
50  
51  
52  
53  
54  
55  
56  
57  
58  
59  
60
1. Emma Children's Hospital, Amsterdam UMC, University of Amsterdam, Vrije Universiteit, Paediatric Surgical Centre, Amsterdam, The Netherlands. Electronic address: rr.gorter@vumc.nl / r.bakx@amc.uva.nl / m.knaapen@uva.amc.nl / e.vanheurn@amc.uva.nl
  2. University Surgery Unit, Faculty of Medicine, University of Southampton, Southampton General Hospital, Southampton, UK; Department of Paediatric Surgery and Urology, Southampton Children's Hospital, Southampton, UK. Electronic address: n.j.hall@soton.ac.uk
  3. Emma Children's Hospital, Amsterdam UMC, University of Amsterdam, Paediatric clinical Research Office, Amsterdam, The Netherlands. Electronic address: j.h.vanderlee@amc.uva.nl
  4. Child Health Evaluative Sciences, The Hospital for Sick Children Research Institute, Toronto, Canada; Electronic address: nancy.butcher@sickkids.ca
  5. Department of Paediatrics, The Hospital for Sick Children, University of Toronto, Toronto, Canada. Electronic address: martin.offringa@sickkids.ca

Address correspondence to Max Knaapen, MD

Address: Emma Children's Hospital, Amsterdam UMC, University of Amsterdam, Vrije Universiteit, Paediatric Surgical Centre, Amsterdam. PO Box 22660, 1100DD Amsterdam, the Netherlands.

Email: M.Knaapen@AMC.UvA.nl

Telephone: +31-20-5665693

Word count: 4723

Funding statement: None

Competing interests statement: None to declare

## 39 ABSTRACT

### 40 Introduction

41 Appendicitis is a global disease affecting roughly one in every 12 people in the world, with  
42 the highest incidence between ages 10 and 19 years. To date, a wide variety of health  
43 outcomes have been reported in randomized controlled trials (RCTs) and meta-analyses  
44 evaluating treatments for appendicitis. This is especially the case in studies comparing non-  
45 operative treatment to operative treatment. A set of standard outcomes, to be reported in all  
46 future trials, is needed to allow for adequate comparison and interpretation of clinical trial  
47 results and to make data pooling possible. This protocol describes the development of such  
48 a global core outcome set (COS) to allow unified reporting of treatment interventions in  
49 children with acute uncomplicated appendicitis.

### 50 Methods and analysis

51 We use current international standard methodology for the development and reporting of this  
52 COS. Its development consists of three phases: (1) Update the most recent systematic  
53 review on outcomes reported in uncomplicated paediatric appendicitis research, to identify  
54 additional outcomes, (2) Three-step global Delphi study to identify a set of core outcomes for  
55 which there is consensus between parents and (paediatric) surgeons, and (3) Expert meeting  
56 to finalize the COS and its definitions. Children and young people will be involved through  
57 their parents during phase two and will be engaged directly using a customized face-to-face  
58 approach.

### 59 Ethics and dissemination.

60 The medical research ethics committee of the Academic Medical Centre Amsterdam has  
61 approved the study. Each participating country/research group will ascertain ethics board  
62 approval. Electronic informed consent will be obtained from all participants. Results will be  
63 presented in peer-reviewed academic journals and at (international) conferences.

### 64 Registration details

65 The COS development project was registered with the COMET initiative in February 2018  
66 (<http://www.comet-initiative.org/studies/details/1119>).

## 67 Article Summary

### 68 Strengths and limitations of this study

- 70 1. Globally relevant set of outcomes to be assessed in prospective research
- 71 2. International steering committee including patient representation
- 72 3. Involvement of parents and their children in choosing what to measure
- 73 4. Direct face-to-face involvement of young people, however, only in selected countries
- 74 5. Limited face-to-face consensus

## 76 INTRODUCTION

77 Appendicitis is a common gastro-intestinal disease affecting roughly one in every 12 people  
78 in the world, with the highest incidence between ages 10 and 19 years[1,2]. While the  
79 incidence varies from country to country, appendicitis is a global disease[3]. In the last  
80 decade, there have been several developments in the treatment of appendicitis in children,  
81 with the most recent being non-operative treatment (NOT) for acute uncomplicated  
82 appendicitis. Studies investigating the effectiveness of NOT in children show promising  
83 results[4–7]. However, the selected primary (and secondary) outcomes vary widely, as  
84 reflected in recent systematic reviews assessing the efficacy and safety of NOT, this may  
85 contribute to their contradictory conclusions[4–8]. In the systematic review by Georgiou et  
86 al.[4], the need for universal outcome selection and reporting in appendicitis studies is  
87 emphasized. In general, it is recognized that clinical trials in children often lack outcomes that  
88 are appropriately chosen for this particular population[9].

89 Inconsistent selection and reporting of outcomes limits the ability to adequately compare and  
90 interpret clinical trial results. Furthermore, it hampers data pooling and subsequent meta-  
91 analysis. It also increases the risk of selective outcome reporting, a form of publication bias.  
92 This in turn jeopardizes the validity of results from individual trials, which feeds into  
93 subsequent systematic reviews[10] and meta-analyses, which are by nature retrospective,  
94 and therefore liable to various risks of bias[11,12].

95 As demonstrated by Hall et al. in 2015, a wide variety of outcomes has been reported in  
96 randomized controlled trials (RCTs) and meta-analyses reporting on the treatment of  
97 appendicitis in children[13]. In the 63 included studies, a total of 115 different outcomes were  
98 reported[13]. Hall et al. proposed the development of a Core Outcome Set (COS), which is a  
99 standardized collection of outcomes that should be measured and reported in all future  
100 trials[14]. Recently a study protocol was published for developing such a COS in the United  
101 Kingdom[15]. To overcome any limitations of a COS focused on UK-specific surgical  
102 practice, the aim of this study is to develop an international COS to be used for trials  
103 assessing the treatment of acute uncomplicated appendicitis in children. The development of  
104 this protocol and the international COS is being performed in conjunction with the UK  
105 research group. Outcomes considered important by patients and families are essential to a  
106 meaningful and complete COS[16]. Parent and patient representation in the development of  
107 this protocol was provided through the Dutch patient and parent Foundation: “Children and  
108 Hospital”. Furthermore, parents and patients will play a central role in the consensus process  
109 as a stakeholder group.

## 110 Scope

1  
2  
3 111 We aim to reach a global consensus amongst patients, parents, researchers and physicians  
4 112 on the minimal set of core outcomes that should be measured and reported in all future  
5 113 clinical trials investigating any type of treatment for acute uncomplicated appendicitis in  
6 114 children, including surgical treatment, non-operative treatment or other treatment aimed at  
7 115 curing appendicitis.  
8  
9  
10

## 11 116 **METHODS**

12  
13  
14 117 In the development of this protocol, we adhere to the COS-STAD (Core Outcome Set-  
15 118 STAndards for Development) recommendations[17] and the COMET (Core Outcome  
16 119 Measures in Effectiveness Trials) handbook[18]. The completed COS-STAD checklist can be  
17 120 found in online supplement S1. The final core outcome set will be reported in accordance  
18 121 with the COS-Standards for reporting (COS-STAR) statement[19]. Involvement of patients  
19 122 and the public will be described using the GRIPP2 reporting checklist[20] (Guidance for  
20 123 Reporting on Involvement of Patients and Public). This study was registered with the COMET  
21 124 initiative (registration number: 1119) on February 11, 2018[21].  
22  
23  
24  
25  
26  
27  
28

### 29 126 **Study design**

30  
31 127 The paediatric appendicitis COS (PA-COS) development will consist of three phases: (1) An  
32 128 update of the 2015 systematic review on outcomes reported in uncomplicated paediatric  
33 129 appendicitis research[13], in order to identify any additional outcomes used in trials that were  
34 130 published since the previous systematic review; (2) A three-step Delphi study to identify a set  
35 131 of core outcomes from those selected in the literature review. Development of the Delphi is  
36 132 performed according to the checklist by Sinha et al.[22] on the design and reporting of Delphi  
37 133 studies concerning COS selection; and (3) An expert panel meeting to ratify the final COS,  
38 134 including physicians, researchers and children/parent representatives. Children and young  
39 135 people will be involved through their parents during phase two and will be engaged directly  
40 136 using a customized approach.  
41  
42  
43  
44  
45  
46  
47  
48

### 49 138 **Steering Committee**

50  
51 139 An international steering committee has been established and consists of the following; the  
52 140 authors, a parent/patient representative of the Dutch Foundation: "Children and Hospital",  
53 141 and the lead local investigator of each participating centre (paediatric appendicitis COS  
54 142 development group). The steering committee will agree on the final version of the protocol at  
55 143 the start of the project and will provide input throughout the duration of the project. The  
56 144 steering committee members will also be involved in the development of the final COS.  
57  
58  
59 145 Within the steering committee, a smaller study management group has been appointed  
60

1  
2  
3 146 which will convene during regular (videoconference) meetings.  
4

5  
6 147 **Systematic review: Treatment outcomes**  
7

8 148 Hall et al. performed a systematic review of RCTs and meta-analyses reporting treatment  
9 149 outcomes in children with appendicitis up to April 2014[13]. The 115 unique outcomes were  
10 150 collapsed into a total of 38 standardized outcome terms. We will update the systematic  
11 151 review to identify any additional reported outcomes in clinical trials or systematic reviews. All  
12 152 RCTs and systematic reviews/meta-analyses reporting treatment outcomes of acute  
13 153 uncomplicated appendicitis in children (<18 years of age) published between January 1<sup>st</sup>  
14 154 2014 and November 23<sup>th</sup> 2017 will be included. The final review will follow the PRISMA  
15 155 reporting guideline[23]. We will search the Cochrane Central Register of Controlled Trials,  
16 156 MEDLINE and EMBASE with the help of a clinical librarian. Additional information on the  
17 157 search strategy/study selection and data extraction can be found in online supplement S2.  
18 158 Studies only reporting outcomes of treatment in complex or complicated appendicitis (for  
19 159 example - gangrenous or perforated appendicitis, appendiceal mass, appendiceal abscess)  
20 160 will be excluded.  
21  
22  
23  
24  
25  
26  
27  
28

29 161 After data extraction, a meeting of the study management group will be held to discuss  
30 162 potential similarity between the outcomes in order to assign an appropriate standardized  
31 163 outcome term for them. Outcome terms will be mapped to four core areas (death, life impact,  
32 164 resource use, pathophysiological manifestations) in accordance with the methods from the  
33 165 OMERACT FILTER 2.0[24]. Although Hall et al.[13] chose to list the adverse events as a  
34 166 separate core area, we will reclassify these outcome terms to one of the four core areas  
35 167 (Table 1.). We will however, label adverse events of treatment separately, as the OMERACT  
36 168 filter suggests[24]. A meeting of the study management group will be held to discuss  
37 169 potential similarity between outcomes and to assign an appropriate outcome term for similar  
38 170 outcomes. Outcomes that are only found once and are not generalizable can be excluded  
39 171 (e.g. the width of lateral thermal damage of the mesoappendix after appendectomy).  
40 172 Grouping the outcomes under a common outcome term aims to arrive at a manageable and  
41 173 cohesive list of outcomes that is appropriate as a basis for the Delphi questionnaire.  
42  
43  
44  
45  
46  
47  
48  
49  
50  
51  
52  
53  
54  
55  
56  
57  
58  
59  
60



174 **Table 1. Outcome Core Areas**

| Core Area                         | Example(s)                                                                                                      |
|-----------------------------------|-----------------------------------------------------------------------------------------------------------------|
| Life impact                       | <i>Quality of life, loss of ability to work</i>                                                                 |
| Resource use                      | <i>Length of hospital stay, healthcare costs, societal cost</i>                                                 |
| Pathophysiological Manifestations | <i>Biochemical parameters, organ function, (ir)reversible manifestations (complications, pathology results)</i> |
| Death                             | <i>Death</i>                                                                                                    |

175

176 **Stakeholders and recruitment**177 **1) Children and Young People**

178 Children and young people (5-18 years) who have been treated for acute  
 179 uncomplicated appendicitis in the preceding 24 months, either with initial NOT or with  
 180 surgery. Children less than 5 years old are excluded since different outcomes might  
 181 be appropriate in this very young age group. Also, uncomplicated appendicitis is  
 182 much less common in young children than in older children. Furthermore, there are  
 183 no studies in which children below the age of 5 are treated non-operatively. Children  
 184 will be engaged (indirectly) through their parents in the Delphi questionnaire, and  
 185 directly through a customized face-to-face approach in selected countries. For the  
 186 invited children, considering the complexity of the subject and methodology, age is  
 187 limited to 12-18 years.

188

189 **2) Parents**

190 Parents of children and young people (5-18 years) treated for acute uncomplicated  
 191 appendicitis either with initial NOT or with surgery in the preceding 24 months or  
 192 during the initial phase of the study. Parents will be asked to discuss the answers  
 193 they provide with their child whilst filling out the Delphi questionnaire. Parents will be  
 194 invited to participate by their child's treating physician or their designate in each  
 195 participating country/hospital. Participants will be identified retrospectively by



196 contacting patients that were treated in the past 24 months or prospectively by  
197 inviting patients to participate directly after they have completed their treatment.

198

### 199 **3) (Paediatric) Surgeons**

200 General and/or paediatric surgeons who care for children in the specified age group  
201 will be asked to participate. Surgeons will be identified and invited by the local  
202 coordinators in each participating country. These local coordinators are research  
203 groups that have previously registered a clinical trial on uncomplicated appendicitis in  
204 children. This should allow for inclusion of physicians that also have experience in  
205 research on the treatment of appendicitis.

206

### 207 **Participating countries and research groups**

208 It was decided to invite research groups that are currently conducting clinical trials on the  
209 treatment of acute uncomplicated in children. Groups were identified through  
210 [www.clinicaltrials.gov](http://www.clinicaltrials.gov) by searching (January 2017) for 'appendicitis' with an age limitation of  
211 5-18 years. Studies with a mixed population (children and adults) were excluded. Studies  
212 that had been completed before 2014, had not been updated since 2015, or with incomplete  
213 registrations, were excluded. We found 111 trials, of which 12 trials assessed the treatment  
214 of uncomplicated appendicitis in children. Groups from the Netherlands, USA, Canada,  
215 Australia, Sweden, Finland, UK, France, Italy, Israel, Japan, Singapore and Malaysia were  
216 identified. Some trials included hospitals from multiple countries.

### 217 **Sample size**

218 There is no rationale for determining the number of respondents to invite for a Delphi  
219 study[18]. A minimum of seven respondents per stakeholder group is suggested to have a  
220 large enough group to allow for a consensus process[25]. Taking into account that only some  
221 invited participants will register for the Delphi and that not all respondents will complete all  
222 rounds of the Delphi (attrition), a minimum of 40 respondents per stakeholder group per  
223 country will be invited. There will be no maximum. In case the number of respondents per  
224 country is significantly higher than other countries, we will consider a weightage per country  
225 in the analyses. We anticipate that this sample will be large enough to reflect all relevant  
226 opinions.

227

### 228 **Delphi study**

229 International online Delphi study

230 The Delphi method is an effective tool for reaching consensus in a large group without the  
231 need for face-to-face contact[26]. The use of sequential questionnaires which are answered

232 anonymously by stakeholders is an established method for reaching consensus in a group of  
233 experts[22]. Questionnaires will be sent using DelphiManager[27], a web-based system  
234 designed for Delphi studies. The questionnaires will be open simultaneously to all  
235 respondents of the participating countries. After each round, the responses of all participants  
236 are shared anonymously in accordance with the Delphi principle.

237 The list of outcomes from the systematic review will be formatted into questions with  
238 extensive additional information per outcome. The Delphi questionnaire will originally be  
239 formulated in English and will be translated if required. Translation will only be performed by  
240 native speaking professionals.

241 Participants will be asked to score the importance of each outcome using a 1 to 9 Likert  
242 scale as recommended by the Grading of Recommendations Assessment, Development and  
243 Evaluation (GRADE) working group[28] and COMET initiative[18]. A score of 7-9 indicates a  
244 critical outcome for assessing the effect of a treatment, 4-6 important but not critical, 1-3  
245 indicates an outcome with low importance for assessing the treatment effect. It will also be  
246 possible to select an “unable to score” option, which is especially of importance if parents do  
247 not feel equipped to score certain outcomes. The questionnaires will be piloted by a group of  
248 laypersons (n=10) to check for ambiguity and readability.

#### 249 Delphi round one

250 Participants will be divided into two stakeholder groups: parents (with their children), and  
251 surgeons. Parents will be asked to discuss the answers they provide with their child whilst  
252 filling out the Delphi questionnaire. Baseline characteristics (age, country) will be  
253 ascertained. Parents will be asked if their child was treated with non-operative or operative  
254 treatment, time between registration and the first diagnosis of appendicitis and if their  
255 treatment was with or without complications. Surgeons will be asked their speciality  
256 (paediatric, general, abdominal, other), workplace (academic, teaching hospital, non-  
257 teaching hospital), experience with non-operative treatment, experience in research  
258 regarding appendicitis in children.

259 All participants will be asked to score all previously identified outcomes according to their  
260 perceived importance for assessing the treatment effect. In the first round there will be an  
261 option to suggest additional outcomes not yet listed.

262 Participants will have between four and eight weeks to complete each round, depending on  
263 the response rate. In that time they will receive two reminder emails as long as they have not  
264 yet replied to the questionnaire.

265

266 Delphi round one: analysis

1  
2  
3 267 Results will be analysed **by stakeholder group and for all participants** using descriptive  
4 268 statistics. Outcomes will be analysed separately for each stakeholder group, as there is  
5 269 evidence that patients are likely to assign importance to outcomes differently than  
6 270 surgeons[29], which has the potential to influence eventual outcome selection.

9  
10 271 “Consensus-in” will be defined as:

- 12 272 – Greater than 70% of participants in **both** stakeholder groups scoring the outcome as  
14 273 7-9 and less than 15% in **both** stakeholder groups scoring the outcome as 1-3.
- 16 274 – Greater than 90% of participants within **one** stakeholder group scoring the outcome  
18 275 as 7-9. This implies that these outcomes are highly regarded by an individual  
20 276 stakeholder group, and should also be included[18].

22 277 “Consensus-out” will be defined as:

- 25 278 – Greater than 70% of participants in **both** stakeholder groups scoring the outcomes as  
26 279 1-3 and less than 15% of participants in **both** stakeholder groups scoring the  
28 280 outcome as 7–9. Consensus-out can only be reached when there is consensus  
29 281 across **both** stakeholders groups.

31  
32 282 Outcomes that do not meet any of these criteria will be defined as “no consensus”. A  
33 283 stratified analysis will be performed to check for skewing as a result of divergent opinions  
34 284 from a single country or surgeons with or without research experience.

37 285 At the end of round one, there will be a meeting of the study management group to assess  
38 286 whether an alteration in the Delphi study is appropriate. If additional outcomes are suggested  
39 287 by Delphi participants, each outcome will be assessed by the study management group to  
40 288 determine whether it is indeed new and to which category it should be classified. Wording of  
41 289 the Delphi questionnaire will be adjusted if misinterpretation is suspected.

45  
46 290 Delphi rounds two and three

47  
48 291 All participants who have completed the previous round will be asked to participate in the  
49 292 next round. Only outcomes that have not been defined as “consensus-in” or “consensus-out”  
50 293 during the previous round will be presented in the following rounds to all participants.  
51 294 Outcomes for which there was “consensus-in” only within a single stakeholder group, will still  
52 295 be presented to the other stakeholder group to evaluate whether consensus can be achieved  
53 296 in both stakeholder groups. An overview of included and excluded outcomes will be  
54 297 available. The outcomes for which there is no consensus and the newly suggested outcomes  
55 298 from the previous rounds will be presented with the participants’ individual score and the  
56 299 median scores from each stakeholder group combined with a histogram showing the scoring

1  
2  
3 300 distribution. Participants will be asked again to score all remaining outcomes in the same  
4 301 manner as in round one.

6  
7 302 Delphi rounds two and three analysis

8 303 Results will be analysed per stakeholder group and for all participants, using descriptive  
9 304 statistics with the same definitions for consensus in/out as in the first Delphi round, including  
10 305 a stratified analysis. After the second round, there will be a meeting of the study  
11 306 management group to assess the need for alteration in the Delphi study, and to decide  
12 307 whether or not to proceed with a third Delphi round, assuming consensus between **both**  
13 308 stakeholder groups on more than 80% of the outcomes, and more than five outcomes with  
14 309 consensus in. To give an estimate of the degree of agreement between respondents, the  
15 310 width of the interquartile range of the median ranking score will be calculated, potentially  
16 311 ranging from 0.00, meaning complete agreement, to 8.00, meaning least possible  
17 312 agreement. This will be calculated for both the individual stakeholder groups as well as the  
18 313 entire group of respondents after the final round.

### 26 27 314 **Face-to-face engagement of young people**

28  
29 315 We wish to check for discrepancies of opinion between parents answering the Delphi  
30 316 together with their child and children who are interviewed directly. For this, a form of in-  
31 317 person interaction will be organised with young people (12-18 years) who have been treated  
32 318 for appendicitis. They will be asked to comment on the preliminary COS selection  
33 319 established at the end of the Delphi study, and to suggest additional outcomes and comment  
34 320 on outcomes that did not make the preliminary COS selection. This will either be done by a  
35 321 short, face-to-face, one round questionnaire involving only outcomes relevant to  
36 322 children/young people, or in the form of a small consensus meeting (prioritization meeting)  
37 323 before finalizing the definitive COS. Due to feasibility, the face-to-face engagement will take  
38 324 place in selected countries and separate ethics board approval will be obtained as  
39 325 appropriate in those countries.

### 46 47 326 **Consensus discussion**

48  
49  
50 327 If adequate consensus (we aim to achieve consensus on at least one outcome per  
51 328 OMERACT core area) is reached in the Delphi study, we will organise a face-to-face expert  
52 329 panel meeting with selected individuals with the purpose to ratify a pragmatic and well-  
53 330 defined set of outcomes. A secondary aim of this meeting is to enhance support and  
54 331 implementation of the final COS.

55  
56  
57 332 The meeting will be held at an international conference for paediatric surgery. Through  
58 333 purposive sampling, approximately 30 "experts" from across all stakeholder groups, including

1  
2  
3 334 physicians, researchers and children/parent representatives, will be invited to participate in a  
4 335 face-to-face meeting with the Steering Committee. Journal editors and healthcare  
5 336 commissioners will also be invited to attend in an observational capacity with the purpose of  
6 337 promoting implementation and to provide comments on the final list of outcomes.  
7  
8  
9

10 338 In the event that adequate consensus cannot be reached in the Delphi process, we will  
11 339 organise a formal face-to-face consensus meeting or teleconference. In that case, we will  
12 340 select an appropriate representation of all stakeholder groups from the panel members that  
13 341 participated in the Delphi study.  
14  
15  
16

### 17 342 **Final COS development**

18  
19  
20 343 The goal is to achieve a pragmatic COS that is applicable and feasible for all future trials that  
21 344 evaluate the treatment of uncomplicated appendicitis in children. To achieve the goal of a  
22 345 pragmatic COS we aim to arrive at a maximum of 10 outcomes. As a minimum, we aim to  
23 346 have at least one outcome per core area. If consensus is reached on more than 10  
24 347 outcomes, the 10 outcomes with the highest level of consensus will be considered part of the  
25 348 suggested COS. Highest level of consensus depends on whether there is consensus in both  
26 349 stakeholder groups, the median score that was appointed to the outcome, and the  
27 350 interquartile range of the median score as an estimate of the degree of consensus.  
28  
29  
30

31  
32  
33 351 Only outcomes for which consensus is reached internationally will be selected. To test for  
34 352 country bias, stratified analyses of the Delphi results will be performed. The results from the  
35 353 face-to-face engagement of young people will be taken into account for the final COS  
36 354 selection and will be reported separately. If there is no consensus between patients, parents  
37 355 and healthcare professionals, an outcome can still be selected if there is clear consensus  
38 356 within a single stakeholder group. These will be reported separately. The final COS will be  
39 357 categorised according to the four core areas.  
40  
41  
42  
43  
44

### 45 358 **Ethics and dissemination.**

#### 46 359 **Ethics**

47  
48 360 The medical research ethics committee of the Academic Medical Centre Amsterdam  
49 361 confirmed that the Dutch Medical Research Involving Human Subjects Act (WMO) does not  
50 362 apply to this study and that complete approval of this study by the committee is not required.  
51 363 Each participating country/research group will be asked to obtain ethics board approval or  
52 364 confirm that ethics board approval is not required. Electronic informed consent will be  
53 365 obtained from all participants. The face-to-face engagement of young people (12-18 years)  
54 366 will take place in selected countries and separate ethics board approval will be obtained, as  
55 367 appropriate.  
56  
57  
58  
59  
60

### 368 Data collection and confidentiality

369 All data will be handled confidentially and in accordance with the Dutch Personal Data  
370 Protection Act and the European General Data Protection Regulation (GDPR).  
371 DelphiManager[27] will be used for the online questionnaire. After informed consent from all  
372 participants only limited identifying information (name, email) will be ascertained during  
373 registration. This information will be stored separately from the answers given in the  
374 questionnaire and will only be used for the purpose of direct feedback and reminder emails.  
375 Access to personally identifiable data will be strictly limited.

### 376 Dissemination

377 Dissemination of the results will be accomplished by publication in an international peer-  
378 reviewed scientific journal and by presentations at (international) conferences. By inviting as  
379 many of the principal investigators who are currently involved in research on uncomplicated  
380 appendicitis in children, we aim to optimize implementation of the final COS. By involving  
381 journal editors and healthcare commissioners in the face-to-face consensus discussion, we  
382 aim to ultimately have the COS introduced as a requirement in future outcome reporting on  
383 the treatment of uncomplicated appendicitis in children.

## 384 **DISCUSSION**

### 385 **Strengths and limitations of this study**

#### 386 **Outcomes selection**

387 The selection of potential outcomes will be done systematically and will provide a selection  
388 for the first Delphi questionnaire that reflects most issues pertinent to the treatment of  
389 uncomplicated appendicitis. By including systematic reviews/meta-analyses that also report  
390 on non-comparative studies, we expect to identify all reported treatment outcomes, including  
391 those from the relatively new field of NOT for uncomplicated appendicitis.

392 To be able to arrive at a manageable list of outcomes that is appropriate for a Delphi study,  
393 the number of outcome terms needs to be somewhat limited. In order to achieve this, the  
394 outcomes derived from our systematic review will be merged in case of similarity. If  
395 outcomes are not generalizable and only reported once, they will be excluded. This will be  
396 proposed and prepared by two independent reviewers and discussed in the study  
397 management group. However, the merging of outcomes will inevitably lead to some loss of  
398 detail.

#### 399 **Global consensus**

400 In order to reflect the views of different stakeholders, a variety of groups will be part of the  
401 development of this COS. This is not only the case on a national level, but also on an  
402 international level, related to, for example, differences between countries in resources,



1  
2  
3 403 treatment practises for acute uncomplicated appendicitis, and cultural differences. By also  
4 404 involving patients and parents from the participating countries we hope to correct for these  
5 405 differences[30]. Involving members from different countries will not only lead to the  
6 406 development of a COS that reflects the opinions of the international community, it should  
7 407 also lead to an internationally applicable “minimal” COS. However, selecting the participating  
8 408 countries on the basis of their involvement in research on appendicitis in children is a  
9 409 limitation. This choice was made on the basis of feasibility. Researchers in the field of  
10 410 uncomplicated appendicitis have an interest in the development of a COS and have the  
11 411 network to help carry out the Delphi study. With our current selection we will, however, have  
12 412 participants from four different continents. Our means of selection has another advantage.  
13 413 Since non-operative treatment is an important research subject in childhood appendicitis, we  
14 414 aim to include surgeons and parents who have experience in that field. As non-operative  
15 415 treatment is still experimental in most of the world, we need surgeons and patients who have  
16 416 been involved in such research.

#### 26 417 **Limited face-to-face consensus**

27 418 If consensus is reached in the Delphi study we will not be organising a formal consensus  
28 419 meeting. The Delphi method can be used for reaching consensus in a group of respondents  
29 420 without the need for face-to-face contact. There is a risk of bias if a face-to-face consensus  
30 421 meeting leads to selection of only participants who are able to attend the meeting, which is  
31 422 especially a problem in a global consensus procedure. There are also problems regarding  
32 423 language barriers in an international consensus meeting. To check for interpretation errors in  
33 424 the Delphi method and to ensure a pragmatic and well-defined set of outcomes the results of  
34 425 the Delphi study will be discussed in an (international) expert meeting. The influence of this  
35 426 meeting on which outcomes are selected for the final COS is however very limited, as this is  
36 427 decided in the prior Delphi study.

#### 44 428 **Involving parents and their children**

45 429 Involving patients in COS development has recently become common practice with 88%  
46 430 (n=112 as of April 12<sup>th</sup> 2016) of ongoing COS development studies doing so[18]. Involving  
47 431 patients as participants seems imperative as patients may identify different outcomes that  
48 432 should be measured, compared with physicians[16]. Several recent COS development  
49 433 projects have attempted to engage children/young people in developing their COS, either as  
50 434 part of the advisory group or the steering committee, or as a stakeholder group in the  
51 435 Delphi[15,22], focus groups[31], interviews[32] or as a part of the consensus meeting[33].  
52 436 Attempts to engage children and young people in an online Delphi questionnaire have  
53 437 proven to be difficult. In the UK COS for uncomplicated appendicitis, there were substantial  
54 438 difficulties with retaining young people in the consecutive rounds of the Delphi questionnaire,



1  
2  
3 439 despite extensive efforts to optimize the methodology to appeal to children and young  
4 440 people, including: preliminary semi-structured interviews on the subject, pre-testing of the  
5 441 Delphi survey by young people and children[15] and video animations explaining the need for  
6 442 a COS. Parent participation however showed more promising results. Consequently, to  
7 443 safeguard the input of children/young people, the Delphi questionnaire for this study will be  
8 444 developed to be completed by parents with input from their children (5-18 years) whenever  
9 445 possible. In order to ensure that there are no large discrepancies between the opinions of  
10 446 parents with their children, and with children without their parents, we will organize a form of  
11 447 in-person interaction with young people (12-18 years) who have been treated for  
12 448 appendicitis. Involving children/young people in COS development is a subject of interest in  
13 449 many ongoing COS development projects. If experience from these groups warrants a  
14 450 change in our methodology, we will adjust our protocol accordingly during the course of the  
15 451 development and publish the updated protocol on an online, open source format (via the  
16 452 Open Science Framework).

17 453 A limitation is that due to the international nature of our study it will not be feasible to engage  
18 454 children directly in all the participating countries. That is why the face-to-face engagement  
19 455 will take place in selected countries.

### 31 456 **Other stakeholders**

32 457 After careful consideration and consultation with the participating countries, it was decided  
33 458 not to include paediatricians, general practitioners, or emergency medicine physicians.  
34 459 Although all these specialists play an intricate role in the diagnosis and care for children with  
35 460 appendicitis, they do not make the final decision regarding treatment or its provision. We will  
36 461 however, depending on the organisation of the healthcare system in each country, ask these  
37 462 stakeholders to comment on the final COS in order to ensure that essential outcomes are not  
38 463 missed. Since almost all research regarding treatment of paediatric uncomplicated  
39 464 appendicitis is initiated by (paediatric) surgeons, it was decided that researchers will not be  
40 465 included as a separate individual stakeholder group. However, involvement in research will  
41 466 be registered. Whilst their opinion is vital to the development of a COS, it is likely researchers  
42 467 will be well represented in the (paediatric) surgeon stakeholder group. A stratified analyses  
43 468 will be performed to check for skewing of the results by surgeons involved in research. It was  
44 469 also decided not to include journal editors or healthcare commissioners. Even though their  
45 470 opinion is of great importance especially regarding implementation, it was determined that  
46 471 their opinion is not essential in establishing the outcomes selected for the COS. There is  
47 472 much variability between countries regarding the role of these stakeholders, which would  
48 473 lead to major challenges regarding Delphi analyses of such a small stakeholder group.  
49 474 However, to enhance implementation and because of their expertise on the use of COSs,

1  
2  
3 475 representatives from these stakeholder groups will be asked to attend the final consensus  
4 476 discussion.

6  
7 477 **Outcome measures**

8 478 This study will not answer the question on how to measure the outcomes that are included in  
9 479 the final COS, or at what time point the outcomes should be measured. We will however  
10 480 attempt to come to a clear definition of each outcome. We expect that further research will be  
11 481 necessary to answer the question of timing and how to measure the outcomes. We will  
12 482 advise on this subject in the final report.  
13  
14  
15  
16  
17  
18  
19  
20  
21  
22  
23  
24  
25  
26  
27  
28  
29  
30  
31  
32  
33  
34  
35  
36  
37  
38  
39  
40  
41  
42  
43  
44  
45  
46  
47  
48  
49  
50  
51  
52  
53  
54  
55  
56  
57  
58  
59  
60

For peer review only

1  
2  
3 484 **FOOTNOTES**  
4

5 485 **Collaborators:**

6 486 The pediatric surgery departments of following hospitals have initiated the COS project and will  
7 487 contribute by recruiting participants. Nationwide Children's Hospital, Columbus, OH, USA. Hasbro  
8 488 Children's Hospital and Alpert Medical School of Brown University, Providence, RI, USA. Children's  
9 489 Mercy Hospital, Kansas City, MO, USA. Karolinska University Hospital, Stockholm, Sweden.  
10 490 Southampton General Hospital, Southampton, UK. Hôpital des Enfants, Centre Hospitalier  
11 491 Universitaire Toulouse, Toulouse, France. Hôpital Femme-Enfant, University Hospital, CHU Rennes,  
12 492 Rennes, France. Sydney Children's Hospital, Randwick NSW, Australia. KK Women's and Children's  
13 493 Hospital, Singapore. BC Children's Hospital, Vancouver, BC, Canada. The Hospital for Sick Children,  
14 494 Toronto, ON, Canada. Montreal Children's Hospital, Montreal, QC, Canada. Children's Hospital of  
15 495 Manitoba, Winnipeg, MB, Canada. Emma Children's Hospital, Amsterdam UMC, University of  
16 496 Amsterdam, Vrije Universiteit, Amsterdam, Netherlands. Helsinki Children's Hospital, Helsinki, Finland.  
17 497 Universiti Kebangsaan Malaysia Medical Centre (UKMMC), Kuala Lumpur, Malaysia.  
18  
19

20 498  
21 499 **Acknowledgments**

22 500 We acknowledge Hester Rippen as the representative of the Dutch Foundation Children and Hospital  
23 501 for her advice and support in drafting the protocol.  
24 502

25 503 **Author contributions:**

26 504 All authors have contributed to the design of this protocol. MK, NJH JHvdL, RB and RRG have  
27 505 initiated the project. The protocol was drafted by MK which was refined by NJH, JHvdL, RB, MO, NJB,  
28 506 LWEvH, and RRG. Statistical advice was provided by JHvdL. MK was responsible for drafting this  
29 507 manuscript. All authors have contributed to the manuscript and read and approved the final  
30 508 manuscript. The paediatric appendicitis COS development group consist of all local investigators who  
31 509 are responsible for translation, ethical board approval, participant recruitment. They have all read and  
32 510 approved the final manuscript.  
33 511

34 512 **Data sharing statement:**

35 513 The project is registered on the comet-initiative.org which is open access. The study findings will be  
36 514 presented in a report which will be submitted for publication in a relevant peer-reviewed journal to  
37 515 ensure dissemination to relevant healthcare professionals. Findings may also be submitted for  
38 516 presentation at local meetings or conferences. The protocol will be published on an open access  
39 517 repository.  
40 518

41 519 **Funding statement:** This research received no specific grant from any funding agency in the public,  
42 520 commercial or not-for-profit sectors  
43

44 521 **Competing interests statement:** None to declare  
45  
46  
47  
48  
49  
50  
51  
52  
53  
54  
55  
56  
57  
58  
59  
60

523 **REFERENCES**

524

- 525 1 Addiss DG, Shaffer N, Fowler BS, *et al.* the Epidemiology of Appendicitis and  
526 Appendectomy in the United States. *Am J Epidemiol* 1990;**132**:910–25.  
527 doi:10.1093/oxfordjournals.aje.a115734
- 528 2 Anderson JE, Bickler SW, Chang DC, *et al.* Examining a common disease with  
529 unknown etiology: trends in epidemiology and surgical management of appendicitis in  
530 California, 1995-2009. *World J Surg* 2012;**36**:2787–94. doi:10.1007/s00268-012-1749-  
531 z
- 532 3 Ferris M, Quan S, Kaplan BS, *et al.* The Global Incidence of Appendicitis. *Ann Surg*  
533 2017;**266**:237–41. doi:10.1097/SLA.0000000000002188
- 534 4 Georgiou R, Eaton S, Stanton MP, *et al.* Efficacy and Safety of Nonoperative  
535 Treatment for Acute Appendicitis: A Meta-analysis. *Pediatrics* 2017;;e20163003.  
536 doi:10.1542/peds.2016-3003
- 537 5 Huang L, Yin Y, Yang L, *et al.* Comparison of Antibiotic Therapy and Appendectomy  
538 for Acute Uncomplicated Appendicitis in Children. *JAMA Pediatr* 2017;**171**:426.  
539 doi:10.1001/jamapediatrics.2017.0057
- 540 6 Xu J, Adams S, Liu YC, *et al.* Nonoperative management in children with early acute  
541 appendicitis: A systematic review. *J Pediatr Surg* Published Online First: May 2017.  
542 doi:10.1016/j.jpedsurg.2017.05.003
- 543 7 Kessler U, Mosbahi S, Walker B, *et al.* Conservative treatment versus surgery for  
544 uncomplicated appendicitis in children: a systematic review and meta-analysis. *Arch*  
545 *Dis Child* 2017;;archdischild-2017-313127. doi:10.1136/archdischild-2017-313127
- 546 8 Gorter RR, The S-MML, Gorter-Stam MAW, *et al.* Systematic review of nonoperative  
547 versus operative treatment of uncomplicated appendicitis. *J Pediatr Surg* 2017;**18 Apr**  
548 **201**. doi:10.1016/j.jpedsurg.2017.04.005
- 549 9 Sinha I, Jones L, Smyth RL, *et al.* A Systematic Review of Studies That Aim to  
550 Determine Which Outcomes to Measure in Clinical Trials in Children. *PLoS Med*  
551 2008;**5**:e96. doi:10.1371/journal.pmed.0050096
- 552 10 Kirkham JJ, Dwan KM, Altman DG, *et al.* The impact of outcome reporting bias in  
553 randomised controlled trials on a cohort of systematic reviews. *BMJ* 2010;**340**:c365.

- 1  
2  
3 554 11 Pogue J, Yusuf S. Overcoming the limitations of current meta-analysis of randomised  
4 555 controlled trials. *Lancet (London, England)* 1998;**351**:47–52. doi:10.1016/S0140-  
5 556 6736(97)08461-4  
6  
7  
8  
9 557 12 Zanchetti A, Mancia G. Searching for information from unreported trials--amnesty for  
10 558 the past and prospective meta-analyses for the future. *J Hypertens* 1998;**16**:125.  
11  
12  
13 559 13 Hall NJ, Kapadia MZ, Eaton S, *et al*. Outcome reporting in randomised controlled trials  
14 560 and meta-analyses of appendicitis treatments in children: a systematic review. *Trials*  
15 561 2015;**16**:275. doi:10.1186/s13063-015-0783-1  
16  
17  
18 562 14 Clarke M. Standardising outcomes for clinical trials and systematic reviews. *Trials*  
19 563 2007;**8**:39. doi:10.1186/1745-6215-8-39  
20  
21  
22 564 15 Sherratt FC, Eaton S, Walker E, *et al*. Development of a core outcome set to  
23 565 determine the overall treatment success of acute uncomplicated appendicitis in  
24 566 children: a study protocol. *BMJ Paediatr Open* 2017;**1**:e000151. doi:10.1136/bmjpo-  
25 567 2017-000151  
26  
27  
28  
29 568 16 Sanderson T, Morris M, Calnan M, *et al*. What outcomes from pharmacologic  
30 569 treatments are important to people with rheumatoid arthritis? Creating the basis of a  
31 570 patient core set. *Arthritis Care Res (Hoboken)* 2010;**62**:640–6. doi:10.1002/acr.20034  
32  
33  
34  
35 571 17 Kirkham JJ, Davis K, Altman DG, *et al*. Core Outcome Set-STAndards for  
36 572 Development: The COS-STAD recommendations. *PLOS Med* 2017;**14**:e1002447.  
37 573 doi:10.1371/journal.pmed.1002447  
38  
39  
40  
41 574 18 Williamson PR, Altman DG, Bagley H, *et al*. The COMET Handbook: version 1.0.  
42 575 *Trials* 2017;**18**:280. doi:10.1186/s13063-017-1978-4  
43  
44  
45 576 19 Kirkham JJ, Gorst S, Altman DG, *et al*. Core Outcome Set-STAndards for Reporting:  
46 577 The COS-STAR Statement. *PLoS Med* 2016;**13**:e1002148.  
47 578 doi:10.1371/journal.pmed.1002148  
48  
49  
50 579 20 Staniszewska S, Brett J, Simera I, *et al*. GRIPP2 reporting checklists: tools to improve  
51 580 reporting of patient and public involvement in research. *BMJ* 2017;**358**:j3453.  
52  
53  
54 581 21 Protocol for the development of a global core outcome set for treatment of  
55 582 uncomplicated appendicitis in children :: Core Outcome Measures in Effectiveness  
56 583 Trials Initiative (COMET). <http://www.comet-initiative.org/studies/details/1119>  
57 584 (accessed 5 Mar 2018).  
58  
59  
60 585 22 Sinha IP, Smyth RL, Williamson PR. Using the Delphi Technique to Determine Which  
18

- 1  
2  
3 586 Outcomes to Measure in Clinical Trials: Recommendations for the Future Based on a  
4 587 Systematic Review of Existing Studies. *PLoS Med* 2011;**8**:e1000393.  
5 588 doi:10.1371/journal.pmed.1000393  
6  
7  
8  
9 589 23 Liberati A, Altman DG, Tetzlaff J, *et al*. The PRISMA statement for reporting  
10 590 systematic reviews and meta-analyses of studies that evaluate health care  
11 591 interventions: explanation and elaboration. *J Clin Epidemiol* 2009;**62**:e1–34.  
12 592 doi:10.1016/j.jclinepi.2009.06.006  
13  
14  
15  
16 593 24 Boers M, Kirwan JR, Gossec L, *et al*. How to choose core outcome measurement sets  
17 594 for clinical trials: OMERACT 11 approves filter 2.0. *J Rheumatol* 2014;**41**:1025–30.  
18 595 doi:10.3899/jrheum.131314  
19  
20  
21 596 25 Mullen PM. Delphi: myths and reality. *J Health Organ Manag* 2003;**17**:37–52.  
22 597 doi:10.1108/14777260310469319  
23  
24  
25 598 26 Murphy MK, Black NA, Lamping DL, *et al*. Consensus development methods, and their  
26 599 use in clinical guideline development. *Health Technol Assess* 1998;**2**:i–iv, 1–88.  
27  
28  
29 600 27 COMET DelphiManager. 2017.<http://www.comet-initiative.org/delphimanager/>  
30 601 (accessed 4 Dec 2018).  
31  
32  
33 602 28 Guyatt GH, Oxman AD, Kunz R, *et al*. GRADE guidelines: 2. Framing the question  
34 603 and deciding on important outcomes. *J Clin Epidemiol* 2011;**64**:395–400.  
35 604 doi:10.1016/j.jclinepi.2010.09.012  
36  
37  
38  
39 605 29 Brookes ST, Macefield RC, Williamson PR, *et al*. Three nested randomized controlled  
40 606 trials of peer-only or multiple stakeholder group feedback within Delphi surveys during  
41 607 core outcome and information set development. *Trials* 2016;**17**:409.  
42 608 doi:10.1186/s13063-016-1479-x  
43  
44  
45  
46 609 30 Biggane AM, Brading L, Ravaud P, *et al*. Survey indicated that core outcome set  
47 610 development is increasingly including patients, being conducted internationally and  
48 611 using Delphi surveys. *Trials* 2018;**19**:113. doi:10.1186/s13063-018-2493-y  
49  
50  
51  
52 612 31 Tsihchaki A, O'Brien K, Johal A, *et al*. Development of a core outcome set for  
53 613 orthodontic trials using a mixed-methods approach: protocol for a multicentre study.  
54 614 *Trials* 2017;**18**:366. doi:10.1186/s13063-017-2098-x  
55  
56  
57 615 32 Allard A, Fellowes A, Shilling V, *et al*. Key health outcomes for children and young  
58 616 people with neurodisability: qualitative research with young people and parents. *BMJ*  
59 617 *Open* 2014;**4**:e004611. doi:10.1136/bmjopen-2013-004611

1  
2  
3 618 33 Morris C, Janssens A, Shilling V, *et al.* Meaningful health outcomes for paediatric  
4 619 neurodisability: Stakeholder prioritisation and appropriateness of patient reported  
5 620 outcome measures. *Health Qual Life Outcomes* 2015;**13**:87. doi:10.1186/s12955-015-  
6 621 0284-7  
7  
8  
9

10 622  
11  
12  
13  
14  
15  
16  
17  
18  
19  
20  
21  
22  
23  
24  
25  
26  
27  
28  
29  
30  
31  
32  
33  
34  
35  
36  
37  
38  
39  
40  
41  
42  
43  
44  
45  
46  
47  
48  
49  
50  
51  
52  
53  
54  
55  
56  
57  
58  
59  
60

For peer review only



## Online supplement 1.

### S1. Completed COS-STAD checklist for PA-COS project

| Domain                | Methodology                                                                                    | Notes                                                                                                                                                                                                                       | Addressed on page number       |
|-----------------------|------------------------------------------------------------------------------------------------|-----------------------------------------------------------------------------------------------------------------------------------------------------------------------------------------------------------------------------|--------------------------------|
| Scope specification   | 1. The research or practice setting(s) in which the COS is to be applied                       | e.g., for application in research studies or for use in routine care                                                                                                                                                        | 4.                             |
|                       | 2. The health condition(s) covered by the COS                                                  | e.g., treatment of rheumatoid arthritis or screening for cancer                                                                                                                                                             | 4.                             |
|                       | 3. The population(s) covered by the COS                                                        | e.g., patients with advanced disease or children                                                                                                                                                                            | 4.                             |
|                       | 4. The intervention(s) covered by the COS                                                      | e.g., all interventions, drug therapy, or surgical interventions                                                                                                                                                            | 4.                             |
| Stakeholders involved | 5. Those who will use the COS in research                                                      | e.g., clinical trialists or industry                                                                                                                                                                                        | 6.                             |
|                       | 6. Healthcare professionals with experience of patients with the condition                     | e.g., clinical experts, practitioners, and investigators with particular experience in the condition                                                                                                                        | 6.                             |
|                       | 7. Patients with the condition or their representatives                                        | involve those who have experienced or who are affected by the condition (e.g., patients, family members, and carers).                                                                                                       | 6.                             |
| Consensus process     | 8. The initial list of outcomes considered both healthcare professionals' and patients' views. | consider the views of healthcare professionals and patients (most likely identified from literature reviews or interviews) when generating an initial list of outcomes for inclusion in the consensus process.              | 5.<br>(No patient involvement) |
|                       | 9. A scoring process and consensus definition were described a priori.                         | Although different consensus methods may be employed in different studies, to avoid any potential biases, COS developers should describe their consensus method a priori.                                                   | 7, 8, 9.                       |
|                       | 10. Criteria for including/dropping/adding                                                     | prespecify criteria for including, dropping, or adding new outcomes to avoid potential biases.                                                                                                                              | 7, 8, 9.                       |
|                       | 11. Care was taken to avoid ambiguity of language used in the list of outcomes.                | consider the language used when describing outcomes in front of different stakeholder groups. An example of 1 approach taken is to include both lay and medical terms, with these previously piloted with the stakeholders. | 7,8.                           |

## 1 Online supplement 2.

### 2 S2. Search strategy for systematic review PA-COS

#### 3 **Appendicitis**

4 "Appendix"[Mesh] OR appendix[tiab] OR appendix[ot] OR "Appendicitis"[Mesh] OR  
5 "Appendectomy"[Mesh] OR appendicit\*[tiab] OR appendicit\*[ot] OR appendectom\*[tiab] OR  
6 appendectom\*[ot] OR appendicectom\*[tiab] OR appendicectom\*[ot]

#### 7 **Children**

8 child\*[tw] OR schoolchild\*[tw] OR infan\*[tw] OR adolescen\*[tw] OR pediatri\*[tw] OR  
9 paediatr\*[tw] OR neonat\*[tw] OR boy[tw] OR boys[tw] OR boyhood[tw] OR girl[tw] OR  
10 girls[tw] OR girlhood[tw] OR youth[tw] OR youths[tw] OR baby[tw] OR babies[tw] OR  
11 toddler\*[tw] OR teen[tw] OR teens[tw] OR teenager\*[tw] OR newborn\*[tw] OR  
12 postneonat\*[tw] OR postnat\*[tw] OR perinat\*[tw] OR puberty[tw] OR preschool\*[tw] OR  
13 suckling\*[tw] OR picu[tw] OR nicu[tw]

#### 14 **3.2.2 Study selection**

15 Selection of studies will be performed by 2 independent reviewers (MK, JF) according to the  
16 below mentioned in- and exclusion criteria. In case of disagreement between two reviewers,  
17 a third independent reviewer (RG) will make the final decision.

##### 18 *Inclusion/Exclusion Criteria:*

19 All RCTs and systematic reviews/meta-analyses reporting the outcome of treatment of acute  
20 uncomplicated appendicitis will be included in this systematic review. By including systematic  
21 reviews that also report on non-comparative studies we expect to identify all reported  
22 treatment outcomes, including those from the relatively new field of non-operative  
23 management of uncomplicated appendicitis. Publications before January 2014 will be  
24 excluded. Only studies in children (<18 years of age) will be included. Studies only reporting  
25 on the outcome of treatment in complex or complicated appendicitis (gangrenous  
26 appendicitis, appendiceal mass, appendiceal abscess) will be excluded.

#### 27 **3.2.3 Data extraction**

28 The two reviewers will extract the data independently using the predefined data extraction  
29 form shown in Appendix A. In case of disagreement a third reviewer will make the final  
30 decision. A risk of bias assessment of the individual studies is not applicable as we will not  
31 be using individual study data but only the reported outcomes. As diversity in terminology will  
32 be anticipated, we decided to initially report all outcome measure as mentioned in the original  
33 study. Outcome measures will be mapped independently by two reviewers and in case of  
34 disagreement a third reviewer will make the final decision. After data extraction of all studies  
35 is completed, a meeting of the study management group will be held between to discuss  
36 potential similarity between the outcome measures in order to assign an appropriate term for  
37 them.

# BMJ Open

## Establishing a core outcome set for treatment of uncomplicated appendicitis in children: study protocol for an international Delphi survey.

|                                 |                                                                                                                                                                                                                                                                                                                                                                                                                                                                                                                                                                                                                                                                                                                                                                                                                                                                                                                                                                                                          |
|---------------------------------|----------------------------------------------------------------------------------------------------------------------------------------------------------------------------------------------------------------------------------------------------------------------------------------------------------------------------------------------------------------------------------------------------------------------------------------------------------------------------------------------------------------------------------------------------------------------------------------------------------------------------------------------------------------------------------------------------------------------------------------------------------------------------------------------------------------------------------------------------------------------------------------------------------------------------------------------------------------------------------------------------------|
| Journal:                        | <i>BMJ Open</i>                                                                                                                                                                                                                                                                                                                                                                                                                                                                                                                                                                                                                                                                                                                                                                                                                                                                                                                                                                                          |
| Manuscript ID                   | bmjopen-2018-028861.R1                                                                                                                                                                                                                                                                                                                                                                                                                                                                                                                                                                                                                                                                                                                                                                                                                                                                                                                                                                                   |
| Article Type:                   | Protocol                                                                                                                                                                                                                                                                                                                                                                                                                                                                                                                                                                                                                                                                                                                                                                                                                                                                                                                                                                                                 |
| Date Submitted by the Author:   | 11-Mar-2019                                                                                                                                                                                                                                                                                                                                                                                                                                                                                                                                                                                                                                                                                                                                                                                                                                                                                                                                                                                              |
| Complete List of Authors:       | Knaapen, Max; Emma Children's Hospital, Amsterdam UMC, University of Amsterdam, Vrije Universiteit, Paediatric Surgical Centre Hall, Nigel; University of Southampton Faculty of Medicine, University Surgery Unit<br>van der Lee, Johanna H.; Emma Children's Hospital, Amsterdam UMC, University of Amsterdam, Paediatric clinical Research Office<br>Butcher, Nancy; Sick Kids, Child Health Evaluative Sciences<br>Offringa, Martin; The Hospital for Sick Children, University of Toronto, Department of Paediatrics<br>Van Heurn, Ernst; Emma Children's Hospital, Amsterdam UMC, University of Amsterdam, Vrije Universiteit, Paediatric Surgical Centre<br>Bakx, Roel; Emma Children's Hospital, Amsterdam UMC, University of Amsterdam, Vrije Universiteit, Paediatric Surgical Centre<br>Gorter, Ramon; Emma Children's Hospital, Amsterdam UMC, University of Amsterdam, Vrije Universiteit, Paediatric Surgical Centre<br>+ On behalf of the paediatric , appendicitis COS development group |
| <b>Primary Subject Heading</b>: | Surgery                                                                                                                                                                                                                                                                                                                                                                                                                                                                                                                                                                                                                                                                                                                                                                                                                                                                                                                                                                                                  |
| Secondary Subject Heading:      | Emergency medicine, Gastroenterology and hepatology, Medical publishing and peer review, Paediatrics, Research methods                                                                                                                                                                                                                                                                                                                                                                                                                                                                                                                                                                                                                                                                                                                                                                                                                                                                                   |
| Keywords:                       | delphi, appendicitis, children, core outcome set, paediatric, Global                                                                                                                                                                                                                                                                                                                                                                                                                                                                                                                                                                                                                                                                                                                                                                                                                                                                                                                                     |
|                                 |                                                                                                                                                                                                                                                                                                                                                                                                                                                                                                                                                                                                                                                                                                                                                                                                                                                                                                                                                                                                          |

SCHOLARONE™  
Manuscripts

1  
2  
3 **1 Establishing a core outcome set for treatment of uncomplicated**  
4 **2 appendicitis in children: study protocol for an international Delphi**  
5 **3 survey.**

6  
7  
8 4 Knaapen M, MD<sup>1</sup>, Hall NJ, MD, PhD<sup>2</sup>, Van der Lee JH, MD, PhD<sup>3</sup>, Butcher NJ, PhD<sup>4</sup>,  
9 5 Offringa M, MD, PhD<sup>4,5</sup>, Van Heurn, Ernst W.E, PhD<sup>1</sup>, Bakx R, MD, PhD<sup>1</sup>, Gorter RR, MD,  
10 6 PhD<sup>1</sup> + On behalf of the paediatric appendicitis COS development group

- 11  
12  
13 7 **1.** Emma Children's Hospital, Amsterdam UMC, University of Amsterdam & Vrije  
14 8 Universiteit, Department of Paediatric Surgery, Amsterdam, The Netherlands. Electronic  
15 9 address: rr.gorter@vumc.nl / r.bakx@amc.uva.nl / m.knaapen@uva.amc.nl /  
16 10 e.vanheurn@amc.uva.nl  
17  
18 11 **2.** University Surgery Unit, Faculty of Medicine, University of Southampton, Southampton  
19 12 General Hospital, Southampton, UK; Department of Paediatric Surgery and Urology,  
20 13 Southampton Children's Hospital, Southampton, UK. Electronic address:  
21 14 n.j.hall@soton.ac.uk  
22  
23 15 **3.** Emma Children's Hospital, Amsterdam UMC, University of Amsterdam, Paediatric clinical  
24 16 Research Office, Amsterdam, The Netherlands. Electronic address:  
25 17 [j.h.vanderlee@amc.uva.nl](mailto:j.h.vanderlee@amc.uva.nl)  
26  
27 18 **4.** Child Health Evaluative Sciences, The Hospital for Sick Children Research Institute,  
28 19 Toronto, Canada; Electronic address: nancy.butcher@sickkids.ca  
29  
30 20 **5.** Department of Paediatrics, The Hospital for Sick Children, University of Toronto, Toronto,  
31 21 Canada. Electronic address: martin.offringa@sickkids.ca

32  
33  
34 22 Address correspondence to Max Knaapen, MD

35  
36  
37 24 Address: Emma Children's Hospital, Amsterdam UMC, University of Amsterdam, Vrije  
38 25 Universiteit, Paediatric Surgical Centre, Amsterdam. PO Box 22660, 1100DD  
39 26 Amsterdam, the Netherlands.

40  
41 27 Email: M.Knaapen@AMC.UvA.nl

42  
43 28 Telephone: +31-20-5665693

44  
45 30 Word count: 5753

46  
47 31 Funding statement: None

48  
49 32 Competing interests statement: None to declare

## 34 **ABSTRACT**

### 35 **Introduction**

36 Appendicitis is a global disease affecting roughly one in every 12 people in the world, with  
37 the highest incidence between ages 10 and 19 years. To date, a wide variety of health  
38 outcomes have been reported in randomized controlled trials (RCTs) and meta-analyses  
39 evaluating treatments for appendicitis. This is especially the case in studies comparing non-  
40 operative treatment to operative treatment. A set of standard outcomes, to be reported in all  
41 future trials, is needed to allow for adequate comparison and interpretation of clinical trial  
42 results and to make data pooling possible. This protocol describes the development of such  
43 a global core outcome set (COS) to allow unified reporting of treatment interventions in  
44 children with acute uncomplicated appendicitis.

### 45 **Methods and analysis**

46 We use current international standard methodology for the development and reporting of this  
47 COS. Its development consists of three phases: (1) Update the most recent systematic  
48 review on outcomes reported in uncomplicated paediatric appendicitis research, to identify  
49 additional outcomes, (2) Three-step global Delphi study to identify a set of core outcomes for  
50 which there is consensus between parents and (paediatric) surgeons, and (3) Expert meeting  
51 to finalize the COS and its definitions. Children and young people will be involved through  
52 their parents during phase two and will be engaged directly using a customized face-to-face  
53 approach.

### 54 **Ethics and dissemination.**

55 The medical research ethics committee of the Academic Medical Centre Amsterdam has  
56 approved the study. Each participating country/research group will ascertain ethics board  
57 approval. Electronic informed consent will be obtained from all participants. Results will be  
58 presented in peer-reviewed academic journals and at (international) conferences.

### 59 **Registration details**

60 The COS development project was registered with the COMET initiative in February 2018  
61 (<http://www.comet-initiative.org/studies/details/1119>).

### 62 **Article Summary: Strengths and limitations of this study**

- 63 1. A globally relevant set of core outcomes for paediatric uncomplicated appendicitis  
64 assessed in an international online Delhi study.
- 65 2. A that protocol was developed in conjunction with an international steering committee,  
66 including patient representation.
- 67 3. Involvement of parents and their children in choosing what to measure in future  
68 uncomplicated appendicitis research.
- 69 4. Direct face-to-face involvement of young people, however, only in selected countries.
- 70 5. A limited consensus discussion with only selected individuals.

## 72 INTRODUCTION

73 Appendicitis is a common gastro-intestinal disease affecting roughly one in every 12 people  
74 in the world, with the highest incidence between ages 10 and 19 years[1,2]. While the  
75 incidence varies from country to country, appendicitis is a global disease[3]. In the last  
76 decade, there have been several developments in the treatment of appendicitis in children,  
77 with the most recent being non-operative treatment (NOT) for acute uncomplicated  
78 appendicitis. Studies investigating the effectiveness of NOT in children show promising  
79 results[4–7]. However, the selected primary (and secondary) outcomes vary widely, as  
80 reflected in recent systematic reviews assessing the efficacy and safety of NOT, this may  
81 contribute to their contradictory conclusions[4–8]. In the systematic review by Georgiou et  
82 al.[4], the need for universal outcome selection and reporting in appendicitis studies is  
83 emphasized. In general, it is recognized that clinical trials in children often lack outcomes that  
84 are appropriately chosen for this particular population[9].

85 Inconsistent selection and reporting of outcomes limits the ability to adequately compare and  
86 interpret clinical trial results. Furthermore, it hampers data pooling and subsequent meta-  
87 analysis. It also increases the risk of selective outcome reporting, a form of publication bias.  
88 This in turn jeopardizes the validity of results from individual trials, which feeds into  
89 subsequent systematic reviews[10] and meta-analyses, which are by nature retrospective,  
90 and therefore liable to various risks of bias[11,12].

91 As demonstrated by Hall et al. in 2015, a wide variety of outcomes has been reported in  
92 randomized controlled trials (RCTs) and meta-analyses reporting on the treatment of  
93 appendicitis in children[13]. In the 63 included studies, a total of 115 different outcomes were  
94 reported[13]. Hall et al. proposed the development of a Core Outcome Set (COS), which is a  
95 standardized collection of outcomes that should be measured and reported in all future  
96 trials[14]. Recently a study protocol was published for developing such a COS in the United  
97 Kingdom[15]. To overcome any limitations of a COS focused on UK-specific surgical  
98 practice, the aim of this study is to develop an international COS to be used for trials  
99 assessing the treatment of acute uncomplicated appendicitis in children. The development of  
100 this protocol and the international COS is being performed in conjunction with the UK  
101 research group. The principal investigator of UK COS (NJ Hall) has been involved from the  
102 beginning of the protocol development and is part of the study management group.  
103 Outcomes considered important by patients and families are essential to a meaningful and  
104 complete COS[16]. That is why parents and patients will play a central role in the consensus  
105 process as a stakeholder group. Parent and patient representation was insured through  
106 involvement of the Dutch patient and parent Foundation: “Children and Hospital”. A  
107 representative from this group provided feedback from the perspective of parents and

1  
2  
3 108 children in several stages of the protocol development. They will also be involved in the  
4  
5 109 development of a face-to-face methodology for engaging children in this COS project.  
6

## 7 110 **Scope**

8  
9 111 We aim to reach a global consensus amongst patients, parents, researchers and physicians  
10 112 on the minimal set of core outcomes that should be measured and reported in all future  
11 113 clinical trials investigating any type of treatment for acute uncomplicated appendicitis in  
12 114 children, including surgical treatment, non-operative treatment or other treatment aimed at  
13 115 curing appendicitis.  
14  
15  
16  
17

## 18 116 **METHODS**

19  
20  
21 117 In the development of this protocol, we adhere to the COS-STAD (Core Outcome Set-  
22 118 STAndards for Development) recommendations[17] and the COMET (Core Outcome  
23 119 Measures in Effectiveness Trials) handbook[18]. The completed COS-STAD checklist can be  
24 120 found in online supplement S1. The final core outcome set will be reported in accordance  
25 121 with the COS-Standards for reporting (COS-STAR) statement[19]. Involvement of patients  
26 122 and the public will be described using the GRIPP2 reporting checklist[20] (Guidance for  
27 123 Reporting on Involvement of Patients and Public). This study was registered with the COMET  
28 124 initiative (registration number: 1119) on February 11, 2018[21].  
29  
30  
31  
32  
33  
34  
35

### 36 126 **Study design**

37  
38 127 The paediatric appendicitis COS (PA-COS) development will consist of three phases: (1) An  
39 128 update of the 2015 systematic review on outcomes reported in uncomplicated paediatric  
40 129 appendicitis research[13], in order to identify any additional outcomes used in trials that were  
41 130 published since the previous systematic review; (2) A three-step Delphi study to identify a set  
42 131 of core outcomes from those selected in the literature review. Development of the Delphi is  
43 132 performed according to the checklist by Sinha et al.[22] on the design and reporting of Delphi  
44 133 studies concerning COS selection; and (3) An expert panel meeting to ratify the final COS,  
45 134 including physicians, researchers and children/parent representatives. Children and young  
46 135 people will be involved through their parents during phase two and will be engaged directly  
47 136 using a customized approach.  
48  
49  
50  
51  
52  
53  
54

### 55 138 **Steering Committee**

56  
57  
58 139 An international steering committee has been established and consists of the following; the  
59 140 authors, a parent/patient representative of the Dutch Foundation: "Children and Hospital",  
60 141 and the lead local investigator of each participating centre (paediatric appendicitis COS



1  
2  
3 142 development group). The steering committee will agree on the final version of the protocol at  
4 143 the start of the project and will provide input throughout the duration of the project. The  
5 144 steering committee members will also be involved in the development of the final COS.  
6  
7 145 Within the steering committee, a smaller study management group has been appointed  
8  
9 146 which will convene during regular (videoconference) meetings.  
10

### 11 12 147 **Systematic review: Treatment outcomes**

13  
14 148 Hall et al. performed a systematic review of RCTs and meta-analyses reporting treatment  
15 149 outcomes in children with appendicitis up to April 2014[13]. They found a 115 unique  
16 150 outcomes which they collapsed into a total of 38 standardized outcome terms. We will update  
17 151 the systematic review to identify any new unique outcomes in clinical trials or systematic  
18 152 reviews. All RCTs and systematic reviews/meta-analyses reporting treatment outcomes of  
19 153 acute uncomplicated appendicitis in children (<18 years of age) published between January  
20 154 1<sup>st</sup> 2014 and November 23<sup>th</sup> 2017 will be included. The final review will follow the PRISMA  
21 155 reporting guideline[23]. We will search the Cochrane Central Register of Controlled Trials,  
22 156 MEDLINE and EMBASE with the help of a clinical librarian. Additional information on the  
23 157 search strategy/study selection and data extraction can be found in online supplement S2.  
24 158 Studies only reporting outcomes of treatment in complex or complicated appendicitis (for  
25 159 example - gangrenous or perforated appendicitis, appendiceal mass, appendiceal abscess)  
26 160 will be excluded.  
27  
28  
29

30  
31  
32  
33  
34  
35 161 After data extraction, a meeting of the study management group (including NJ Hall) will be  
36 162 held to discuss potential similarities between the outcomes from the 2015 systematic review  
37 163 from Hall et al.[13]. New unique outcomes will be discussed within the group in order to  
38 164 assign an appropriate standardized outcome term. If these outcomes do not match any of the  
39 165 original 38 outcome terms a new term will be assigned, figure 1. illustrates this methodology.  
40 166 The new and original outcome terms will be mapped to four core areas (death, life impact,  
41 167 resource use, pathophysiological manifestations) in accordance with the methods from the  
42 168 OMERACT FILTER 2.0[24]. Although Hall et al.[13] chose to list the adverse events as a  
43 169 separate core area, we will reclassify these outcome terms to one of the four core areas  
44 170 (Table 1.). We will however, label adverse events of treatment separately, as the OMERACT  
45 171 filter suggests[24]. A meeting of the study management group will be held to discuss  
46 172 potential similarity between outcomes and to assign an appropriate outcome term for similar  
47 173 outcomes. Outcomes that are only found once and are not generalizable can be excluded  
48 174 (e.g. the width of lateral thermal damage of the mesoappendix after appendectomy).  
49 175 Grouping the outcomes under a common outcome term aims to arrive at a manageable and  
50 176 cohesive list of outcomes that is appropriate as a basis for the Delphi questionnaire.  
51  
52  
53  
54  
55  
56  
57  
58  
59  
60

177 **Table 1. Outcome Core Areas**

| Core Area                         | Example(s)                                                                                                      |
|-----------------------------------|-----------------------------------------------------------------------------------------------------------------|
| Life impact                       | <i>Quality of life, loss of ability to work</i>                                                                 |
| Resource use                      | <i>Length of hospital stay, healthcare costs, societal cost</i>                                                 |
| Pathophysiological Manifestations | <i>Biochemical parameters, organ function, (ir)reversible manifestations (complications, pathology results)</i> |
| Death                             | <i>Death</i>                                                                                                    |

178

179 **Stakeholders and recruitment**180 **1) Children and Young People**

181 Children and young people (5-18 years) who have been treated for acute  
 182 uncomplicated appendicitis in the preceding 24 months, either with initial NOT or with  
 183 surgery. Children less than 5 years old are excluded since different outcomes might  
 184 be appropriate in this very young age group. Also, uncomplicated appendicitis is  
 185 much less common in young children than in older children. Furthermore, there are  
 186 no studies in which children below the age of 5 are treated non-operatively. Children  
 187 will be engaged indirectly as we will urge parents to discuss the answers they provide  
 188 with their child whilst filling out the Delphi questionnaire. Young people will be  
 189 engaged directly through a customized face-to-face approach in selected countries.  
 190 For the invited children, considering the complexity of the subject and methodology,  
 191 age is limited to 12-18 years.

192

193 **2) Parents**

194 Parents of children and young people (5-18 years) treated for acute uncomplicated  
 195 appendicitis either with initial NOT or with surgery in the preceding 24 months or  
 196 during the initial phase of the study. Parents will be asked to discuss the answers  
 197 they provide with their child whilst filling out the Delphi questionnaire. Parents will be  
 198 invited to participate by their child's treating physician or their designate in each

199 participating country/hospital. Participants will be identified retrospectively by  
200 contacting patients that were treated in the past 24 months or prospectively by  
201 inviting patients to participate directly after they have completed their treatment.

202

### 203 **3) (Paediatric) Surgeons**

204 General and/or paediatric surgeons who care for children in the specified age group  
205 will be asked to participate. Surgeons will be identified and invited by the local  
206 coordinators in each participating country. These local coordinators are research  
207 groups that have previously registered a clinical trial on uncomplicated appendicitis in  
208 children. This should allow for inclusion of physicians that also have experience in  
209 research on the treatment of appendicitis.

210

### 211 **Participating countries and research groups**

212 It was decided to invite research groups that are currently conducting clinical trials on the  
213 treatment of acute uncomplicated in children. Groups were identified through  
214 [www.clinicaltrials.gov](http://www.clinicaltrials.gov) by searching (January 2017) for 'appendicitis' with an age limitation of  
215 5-18 years. Studies with a mixed population (children and adults) were excluded. Studies  
216 that had been completed before 2014, had not been updated since 2015, or with incomplete  
217 registrations, were excluded. We found 111 trials, of which 12 trials assessed the treatment  
218 of uncomplicated appendicitis in children. Groups from the Netherlands, USA, Canada,  
219 Australia, Sweden, Finland, UK, France, Italy, Israel, Japan, Singapore and Malaysia were  
220 identified. Some trials included hospitals from multiple countries.

### 221 **Sample size**

222 There is no rationale for determining the number of respondents to invite for a Delphi  
223 study[18]. A minimum of seven respondents per stakeholder group is suggested to have a  
224 large enough group to allow for a consensus process[25]. Taking into account that only some  
225 invited participants will register for the Delphi and that not all respondents will complete all  
226 rounds of the Delphi (attrition), a minimum of 40 respondents per stakeholder group per  
227 country will be invited. There will be no maximum. In case the number of respondents per  
228 country is significantly higher than other countries, we will consider a weightage per country  
229 in the analyses. We anticipate that this sample will be large enough to reflect all relevant  
230 opinions.

231

### 232 **Delphi study**

233 International online Delphi study

234 The Delphi method is an effective tool for reaching consensus in a large group without the

7

1  
2  
3 235 need for face-to-face contact[26]. The use of sequential questionnaires which are answered  
4 236 anonymously by stakeholders is an established method for reaching consensus in a group of  
5 237 experts[22]. Questionnaires will be sent using DelphiManager[27], a web-based system  
6 238 designed for Delphi studies. The questionnaires will be open simultaneously to all  
7  
8 239 respondents of the participating countries. After each round, the responses of all participants  
9 240 are shared anonymously in accordance with the Delphi principle.  
10  
11  
12

13 241 The list of outcomes from the systematic review will be formatted into questions  
14 242 accompanied by an extensive plain language summary per outcome, including figures if  
15 243 appropriate. The Delphi questionnaire will originally be formulated in English and will be  
16 244 translated if required. Translation will only be performed by native speaking professionals.  
17  
18 245 Participants will be asked to score the importance of each outcome using a 1 to 9 Likert  
19 246 scale as recommended by the Grading of Recommendations Assessment, Development and  
20 247 Evaluation (GRADE) working group[28] and COMET initiative[18]. A score of 7-9 indicates a  
21 248 critical outcome for assessing the effect of a treatment, 4-6 important but not critical, 1-3  
22 249 indicates an outcome with low importance for assessing the treatment effect. It will also be  
23 250 possible to select an "unable to score" option, which is especially of importance if parents do  
24 251 not feel equipped to score certain outcomes. The questionnaires including the plain language  
25 252 summaries will be piloted by a group of laypersons (n=10) to check for ambiguity and  
26 253 readability.  
27  
28  
29  
30  
31  
32  
33

#### 34 254 Delphi round one

35 255 Participants will be divided into two stakeholder groups: parents (with their children), and  
36 256 surgeons. Parents will be asked to discuss the answers they provide with their child whilst  
37 257 filling out the Delphi questionnaire. Baseline characteristics (age, country) will be  
38 258 ascertained. Parents will be asked if their child was treated with non-operative or operative  
39 259 treatment, time between registration and the first diagnosis of appendicitis and if their  
40 260 treatment was with or without complications. And also if they will be answering the Delphi  
41 261 whilst consulting their child. Surgeons will be asked their speciality (paediatric, general,  
42 262 abdominal, other), workplace (academic, teaching hospital, non-teaching hospital),  
43 263 experience with non-operative treatment, experience in research regarding appendicitis in  
44 264 children.  
45  
46  
47  
48  
49  
50  
51  
52

53 265 All participants will be asked to score all previously identified outcomes according to their  
54 266 perceived importance for assessing the treatment effect. In the first round there will be an  
55 267 option to suggest additional outcomes not yet listed.  
56  
57

58 268 Participants will have between four and eight weeks to complete each round, depending on  
59 269 the response rate. In that time they will receive a reminder email every two weeks as long as

270 they have not replied to the questionnaire.

271

272 Delphi round one: analysis

273 Results will be analysed **by stakeholder group and for all participants** using descriptive  
274 statistics. Outcomes will be analysed separately for each stakeholder group, as there is  
275 evidence that patients are likely to assign importance to outcomes differently than  
276 surgeons[29], which has the potential to influence eventual outcome selection.

277 “Consensus-in” will be defined as:

- 278 – Greater than 70% of participants in **both** stakeholder groups scoring the outcome as  
279 7-9 and less than 15% in **both** stakeholder groups scoring the outcome as 1-3.
- 280 – Greater than 90% of participants within **one** stakeholder group scoring the outcome  
281 as 7-9. This implies that these outcomes are highly regarded by an individual  
282 stakeholder group, and should also be included[18].

283 “Consensus-out” will be defined as:

- 284 – Greater than 70% of participants in **both** stakeholder groups scoring the outcomes as  
285 1-3 and less than 15% of participants in **both** stakeholder groups scoring the  
286 outcome as 7–9. Consensus-out can only be reached when there is consensus  
287 across **both** stakeholders groups.

288 Outcomes that do not meet any of these criteria will be defined as “no consensus”. A  
289 stratified analysis will be performed to check for skewing as a result of divergent opinions  
290 from a single country or surgeons with or without research experience.

291 At the end of round one, there will be a meeting of the study management group to assess  
292 whether an alteration in the Delphi study is appropriate. If additional outcomes are suggested  
293 by Delphi participants, each outcome will be assessed by the study management group to  
294 determine whether it is indeed new and to which category it should be classified. Wording of  
295 the Delphi questionnaire will be adjusted if misinterpretation is suspected.

296 Delphi rounds two and three

297 All participants who have completed the previous round will be asked to participate in the  
298 next round. Only outcomes that have not been defined as “consensus-in” or “consensus-out”  
299 during the previous round will be presented in the following rounds to all participants.

300 Outcomes for which there was “consensus-in” only within a single stakeholder group, will still  
301 be presented to the other stakeholder group to evaluate whether consensus can be achieved  
302 in both stakeholder groups. An overview of included and excluded outcomes will be

1  
2  
3 303 available. The outcomes for which there is no consensus and the newly suggested outcomes  
4 304 from the previous rounds will be presented with the participants' individual score and the  
5 305 median scores from each stakeholder group combined with a histogram showing the scoring  
6 306 distribution. Participants will be asked again to score all remaining outcomes in the same  
7 307 manner as in round one.

#### 11 308 Delphi rounds two and three analysis

12 309 Results will be analysed per stakeholder group and for all participants, using descriptive  
13 310 statistics with the same definitions for consensus in/out as in the first Delphi round, including  
14 311 a stratified analysis. After the second round, there will be a meeting of the study  
15 312 management group to assess the need for alteration in the Delphi study, and to decide  
16 313 whether or not to proceed with a third Delphi round, assuming consensus between **both**  
17 314 stakeholder groups on more than 80% of the outcomes, and more than five outcomes with  
18 315 consensus in. To give an estimate of the degree of agreement between respondents, the  
19 316 width of the interquartile range of the median ranking score will be calculated, potentially  
20 317 ranging from 0.00, meaning complete agreement, to 8.00, meaning least possible  
21 318 agreement. This will be calculated for both the individual stakeholder groups as well as the  
22 319 entire group of respondents after the final round.

#### 31 320 **Face-to-face engagement of young people**

32 321 We wish to check for discrepancies of opinion between parents answering the Delphi  
33 322 together with their child and children who are interviewed directly. For this, a form of in-  
34 323 person interaction will be organised with young people (12-18 years) who have been treated  
35 324 for appendicitis. They will be asked to comment on the preliminary COS selection  
36 325 established at the end of the Delphi study, and to suggest additional outcomes and comment  
37 326 on outcomes that did not make the preliminary COS selection. This will either be done by a  
38 327 short, face-to-face, one round questionnaire involving only outcomes relevant to  
39 328 children/young people, or in the form of a small consensus meeting (prioritization meeting)  
40 329 before finalizing the definitive COS. Doing this type of research requires experienced  
41 330 interviewers and resources. That is why the face-to-face engagement will only take place in  
42 331 selected countries, however, we will aim to involve as many countries as feasible. Separate  
43 332 ethical board approval will be obtained as appropriate.

#### 53 333 **Consensus discussion**

54 334 If adequate consensus (we aim to achieve consensus on at least one outcome per  
55 335 OMERACT core area) is reached in the Delphi study, we will organise a face-to-face expert  
56 336 panel meeting with selected individuals with the purpose to ratify a pragmatic and well-  
57 337 defined set of outcomes. A secondary aim of this meeting is to enhance support and  
58  
59  
60 10



1  
2  
3 338 implementation of the final COS.  
4

5 339 The meeting will be held at an international conference for paediatric surgery. Through  
6  
7 340 purposive sampling, approximately 30 “experts” from across all stakeholder groups, including  
8  
9 341 physicians, researchers and children/parent representatives, will be invited to participate in a  
10  
11 342 face-to-face meeting with the Steering Committee. Journal editors and healthcare  
12  
13 343 commissioners will also be invited to attend in an observational capacity with the purpose of  
14  
15 344 promoting implementation and to provide comments on the final list of outcomes.

16 345 In the event that adequate consensus cannot be reached in the Delphi process, we will  
17  
18 346 organise a formal face-to-face consensus meeting or teleconference. In that case, we will  
19  
20 347 select an appropriate representation of all stakeholder groups from the panel members that  
21  
22 348 participated in the Delphi study.

### 23 349 **Final COS development**

24  
25 350 The goal is to achieve a pragmatic COS that is applicable and feasible for all future trials that  
26  
27 351 evaluate the treatment of uncomplicated appendicitis in children. There is no recommended  
28  
29 352 maximum number of outcomes that should be included in a COS. However, if the final COS  
30  
31 353 includes too many outcomes, the COS would not be feasible to use in practice. To achieve the  
32  
33 354 goal of a pragmatic COS we aim to arrive at a maximum of 10 outcomes, the same  
34  
35 355 maximum number as the UK COS protocol specifies[15]. As a minimum, we aim to have at  
36  
37 356 least one outcome per core area. If the number of outcomes for which consensus is achieved  
38  
39 357 greatly exceeds 10 outcomes, the outcomes with the highest level of consensus will be  
40  
41 358 considered part of the suggested COS. We will however report all outcomes for which  
42  
43 359 consensus is achieved. The highest level of consensus depends on whether there is  
44  
45 360 consensus in both stakeholder groups, the median score that was appointed to the outcome,  
46  
47 361 and the interquartile range of the median score as an estimate of the degree of consensus.

48  
49 362 Only outcomes for which consensus is reached internationally will be selected. To test for  
50  
51 363 country bias, stratified analyses of the Delphi results will be performed. The results from the  
52  
53 364 face-to-face engagement of young people will be taken into account for the final COS  
54  
55 365 selection and will be reported separately. If there is no consensus between patients, parents  
56  
57 366 and healthcare professionals, an outcome can still be selected if there is clear consensus  
58  
59 367 within a single stakeholder group. These will be reported separately. The final COS will be  
60  
368 categorised according to the four core areas of the OMERACT filter[24]. We will also  
369  
370 annotate the outcomes according to the recently published outcome taxonomy to maximise  
371  
370 future data harmonisation[30].

### 371 **Patient and Public Involvement**



1  
2  
3 372 Patient involvement is at the core of this study design. By asking parents and patients with  
4 373 experience in having simple appendicitis what outcomes they feel should be part of future  
5 374 research. To ensure our design is appropriate for parents and children we have involved the  
6 375 Dutch child and parents representation group as part of our steering committee. In that  
7 376 capacities they provide input on the protocol and study. To make sure the Delphi  
8 377 questionnaire is understandable and has no ambiguities it is checked by a group of  
9 378 laypersons before the start of the Delphi study. Part of the Delphi study is giving feedback to  
10 379 all its participants after each round, this will also be done with the final study results.

## 16 380 **Ethics and dissemination.**

### 18 381 **Ethics**

19 382 The medical research ethics committee of the Academic Medical Centre Amsterdam  
20 383 confirmed that the Dutch Medical Research Involving Human Subjects Act (WMO) does not  
21 384 apply to this study and that complete approval of this study by the committee is not required.  
22 385 Each participating country/research group will be asked to obtain ethics board approval or  
23 386 confirm that ethics board approval is not required. Electronic informed consent will be  
24 387 obtained from all participants. The face-to-face engagement of young people (12-18 years)  
25 388 will take place in selected countries and separate ethics board approval will be obtained, as  
26 389 appropriate.

### 33 390 **Data collection and confidentiality**

34 391 All data will be handled confidentially and in accordance with the Dutch Personal Data  
35 392 Protection Act and the European General Data Protection Regulation (GDPR).  
36 393 DelphiManager[27] will be used for the online questionnaire. After informed consent from all  
37 394 participants only limited identifying information (name, email) will be ascertained during  
38 395 registration. This information will be stored separately from the answers given in the  
39 396 questionnaire and will only be used for the purpose of direct feedback and reminder emails.  
40 397 Access to personally identifiable data will be strictly limited.

### 46 398 **Study status and dissemination**

47 399 In the first quarter (Q1) of 2018 the following 13 countries were invited to participate in the  
48 400 project; Netherlands, USA, Canada, Australia, Sweden, Finland, UK, France, Italy, Israel,  
49 401 Japan, Singapore and Malaysia. Ten countries replied, Italy, Israel and Japan did not. In Q1  
50 402 2018 the systematic review was finished. In Q2 2018 the Delphi questionnaire was  
51 403 developed and piloted. In Q3 2018 all materials were translated. Between Q4 2018 and Q1  
52 404 2019 IRB applications were submitted in 10 countries and 15 participating centres. The  
53 405 anticipated start of the online Delphi study is May 2019. We anticipate to have the final COS  
54 406 ready by Q1 2020. Dissemination of the results will be accomplished by publication in an

1  
2  
3 407 international peer-reviewed scientific journal and by presentations at (international)  
4 408 conferences. By involving the majority of the principal investigators who are currently  
5 409 involved in research on uncomplicated appendicitis in children, we aim to optimize uptake of  
6 410 the final COS. By involving journal editors and healthcare commissioners in the face-to-face  
7 411 consensus discussion, we aim to ultimately have the COS introduced as a requirement in  
8 412 future outcome reporting on the treatment of uncomplicated appendicitis in children. We will  
9 413 also actively send out the final COS to relevant journal editors and funding bodies to promote  
10 414 uptake in future research.

## 16 415 **DISCUSSION**

### 17 416 **Strengths and limitations of this study**

#### 20 417 **Outcomes selection**

21 418 The selection of potential outcomes will be done systematically and will provide a selection  
22 419 for the first Delphi questionnaire that reflects most issues pertinent to the treatment of  
23 420 uncomplicated appendicitis. By including systematic reviews/meta-analyses that also report  
24 421 on non-comparative studies, we expect to identify all reported treatment outcomes, including  
25 422 those from the relatively new field of NOT for uncomplicated appendicitis.

26 423 To be able to arrive at a manageable list of outcomes that is appropriate for a Delphi study,  
27 424 the number of outcome terms needs to be somewhat limited. In order to achieve this, the  
28 425 outcomes derived from our systematic review will be merged in case of similarity. If  
29 426 outcomes are not generalizable and only reported once, they will be excluded. This will be  
30 427 proposed and prepared by two independent reviewers and discussed in the study  
31 428 management group. However, the merging of outcomes will inevitably lead to some loss of  
32 429 detail.

#### 33 430 **Global consensus**

34 431 In order to reflect the views of different stakeholders, a variety of groups will be part of the  
35 432 development of this COS. This is not only the case on a national level, but also on an  
36 433 international level, related to, for example, differences between countries in resources,  
37 434 treatment practises for acute uncomplicated appendicitis, and cultural differences. For  
38 435 example there is a large difference with regard to the standard length of hospital stay after an  
39 436 appendectomy for simple appendicitis. In the USA much effort is devoted to reduce the  
40 437 number of admission days, in the UK there is only limited attention for the duration of  
41 438 admission and for instance in Japan an admission for 5 days is not uncommon. We can  
42 439 expect that these kind of differences result in different opinions regarding the core outcomes  
43 440 set. By also involving patients and parents from the participating countries we hope to correct  
44 441 for these differences[31]. In conjunction with the UK paediatric appendicitis COS research

1  
2  
3 442 group we decided that an international validation of the UK COS would not give the depth of  
4 443 information and would not allow for consensus formation on all possible outcomes. Which we  
5 444 feel is appropriate considering the before mentioned significant differences between  
6 445 countries. Involving members from different countries will not only lead to the development of  
7 446 a COS that reflects the opinions of the international community, it should also lead to an  
8 447 internationally applicable “minimal” COS. However, selecting the participating countries on  
9 448 the basis of their involvement in research on appendicitis in children is a limitation. This  
10 449 choice was made on the basis of feasibility. Researchers in the field of uncomplicated  
11 450 appendicitis have an interest in the development of a COS and have the network to help  
12 451 carry out the Delphi study. With our current selection we will, however, have participants from  
13 452 four different continents. Our means of selection has another advantage. Since non-  
14 453 operative treatment is an important research subject in childhood appendicitis, we aim to  
15 454 include surgeons and parents who have experience in that field. As non-operative treatment  
16 455 is still experimental in most of the world, we need surgeons and patients who have been  
17 456 involved in such research.

#### 27 457 **Limited face-to-face consensus**

28 458 If consensus is reached in the Delphi study we will not be organising a formal consensus  
29 459 meeting. The Delphi method can be used for reaching consensus in a group of respondents  
30 460 without the need for face-to-face contact. There is a risk of bias if a face-to-face consensus  
31 461 meeting leads to selection of only participants who are able to attend the meeting, which is  
32 462 especially a problem in a global consensus procedure. There are also problems regarding  
33 463 language barriers in an international consensus meeting. To check for interpretation errors in  
34 464 the Delphi method and to ensure a pragmatic and well-defined set of outcomes the results of  
35 465 the Delphi study will be discussed in an (international) expert meeting. The influence of this  
36 466 meeting on which outcomes are selected for the final COS is however very limited, as this is  
37 467 decided in the prior Delphi study.

#### 46 468 **Involving parents and their children**

47 469 Involving patients in COS development has recently become common practice with 88%  
48 470 (n=112 as of April 12<sup>th</sup> 2016) of ongoing COS development studies doing so[18]. Involving  
49 471 patients as participants seems imperative as patients may identify different outcomes that  
50 472 should be measured, compared with physicians[16]. For this protocol we performed a  
51 473 scoping review [unpublished work] that found 12 studies that directly engaged children in  
52 474 COS development. Either as part of the advisory group or the steering committee, or as a  
53 475 stakeholder group in the Delphi[15,22], focus groups[32], interviews[33] or as a part of the  
54 476 consensus meeting[34]. Attempts to engage children and young people in an online Delphi  
55 477 questionnaire have proven to be difficult. In the UK COS for uncomplicated appendicitis,

1  
2  
3 478 there were substantial difficulties with retaining young people in the consecutive rounds of  
4 479 the Delphi questionnaire, despite extensive efforts to optimize the methodology to appeal to  
5 480 children and young people, including: preliminary semi-structured interviews on the subject,  
6 481 pre-testing of the Delphi survey by young people and children[15] and video animations  
7 482 explaining the need for a COS. Parent participation however showed more promising results.  
8 483 Consequently, to safeguard the input of children/young people, the Delphi questionnaire for  
9 484 this study will be developed to be completed by parents with input from their children (5-18  
10 485 years) whenever possible. In order to ensure that there are no large discrepancies between  
11 486 the opinions of parents with their children, and with children without their parents, we will  
12 487 organize a form of in-person interaction with young people (12-18 years) who have been  
13 488 treated for appendicitis. Involving children/young people in COS development is a subject of  
14 489 interest in many ongoing COS development projects. As the search for the optimal approach  
15 490 to engage young people is ongoing we have not yet selected a final methodology. Two  
16 491 members of the study management group are currently involved in group that is developing  
17 492 such methodology in consultation with young people themselves. We will update our protocol  
18 493 as soon as we settle on a methodology before starting the face-to-face engagement. The  
19 494 updated protocol will be published on an online, open source format (via the Open Science  
20 495 Framework).

21  
22  
23  
24  
25  
26  
27  
28  
29  
30  
31  
32 496 A limitation is that due to the international nature of our study it will not be feasible to engage  
33 497 children directly in all the participating countries. That is why the face-to-face engagement  
34 498 will take place in selected countries.

### 37 38 499 **Other stakeholders**

39 500 After careful consideration and consultation with the participating countries, it was decided  
40 501 not to include paediatricians, general practitioners, nurses or emergency medicine  
41 502 physicians. Although all these specialists play an intricate role in the diagnosis and care for  
42 503 children with appendicitis, they do not make the final decision regarding treatment or its  
43 504 provision. We will however, depending on the organisation of the healthcare system in each  
44 505 country, ask these stakeholders to comment on the final COS in order to ensure that  
45 506 essential outcomes are not missed. Since almost all research regarding treatment of  
46 507 paediatric uncomplicated appendicitis is initiated by (paediatric) surgeons, it was decided that  
47 508 researchers will not be included as a separate individual stakeholder group. However,  
48 509 involvement in research will be registered. Whilst their opinion is vital to the development of a  
49 510 COS, it is likely researchers will be well represented in the (paediatric) surgeon stakeholder  
50 511 group. A stratified analyses will be performed to check for skewing of the results by surgeons  
51 512 involved in research. It was also decided not to include journal editors or healthcare  
52 513 commissioners. Even though their opinion is of great importance especially regarding

1  
2  
3 514 implementation, it was determined that their opinion is not essential in establishing the  
4  
5 515 outcomes selected for the COS. There is much variability between countries regarding the  
6  
7 516 role of these stakeholders, which would lead to major challenges regarding Delphi analyses  
8  
9 517 of such a small stakeholder group. However, to enhance implementation and because of  
10  
11 518 their expertise on the use of COSs, representatives from these stakeholder groups will be  
12  
13 519 asked to attend the final consensus discussion.

### 13 520 **Outcome measures**

14  
15 521 This study will not answer the question on how to measure the outcomes that are included in  
16  
17 522 the final COS, or at what time point the outcomes should be measured. We will however  
18  
19 523 attempt to come to a clear definition of each outcome. We expect that further research will be  
20  
21 524 necessary to answer the question of timing and how to measure the outcomes. We will  
22  
23 525 advise on this subject in the final report.  
24  
25  
26  
27  
28  
29  
30  
31  
32  
33  
34  
35  
36  
37  
38  
39  
40  
41  
42  
43  
44  
45  
46  
47  
48  
49  
50  
51  
52  
53  
54  
55  
56  
57  
58  
59  
60

**527 FOOTNOTES****528 Paediatric appendicitis COS development group.**

529 Minneci PC, MD, Svensson JF, MD, PhD, Luks FI, MD, PhD, St. Peter SD, MD, Abbo O, MD, Arnaud  
530 AP, MD, Adams S, MBBS, FRACS, Nah SA, MBBS, MRCS, Skarsgard ED, MD, Pierro A, MD, PhD,  
531 Zani A, MD, PhD, Emil S, MD, CM, Keijzer R, MD, PhD, Suominen JS, MD, PhD, Aziz DA, MD, FRCS

**533 Collaborators:**

534 The pediatric surgery departments of following hospitals have initiated the COS project and will  
535 contribute by recruiting participants. Nationwide Children's Hospital, Columbus, OH, USA. Hasbro  
536 Children's Hospital and Alpert Medical School of Brown University, Providence, RI, USA. Children's  
537 Mercy Hospital, Kansas City, MO, USA. Karolinska University Hospital, Stockholm, Sweden.  
538 Southampton General Hospital, Southampton, UK. Hôpital des Enfants, Centre Hospitalier  
539 Universitaire Toulouse, Toulouse, France. Hôpital Femme-Enfant, University Hospital, CHU Rennes,  
540 Rennes, France. Sydney Children's Hospital, Randwick NSW, Australia. KK Women's and Children's  
541 Hospital, Singapore. BC Children's Hospital, Vancouver, BC, Canada. The Hospital for Sick Children,  
542 Toronto, ON, Canada. Montreal Children's Hospital, Montreal, QC, Canada. Emma Children's  
543 Hospital, Amsterdam UMC, University of Amsterdam, Vrije Universiteit, Amsterdam, Netherlands.  
544 Helsinki Children's Hospital, Helsinki, Finland. Universiti Kebangsaan Malaysia Medical Centre  
545 (UKMMC), Kuala Lumpur, Malaysia.

**547 Acknowledgments**

548 We acknowledge Hester Rippen as the representative of the Dutch Foundation Children and Hospital  
549 for her advice and support in drafting the protocol.

**551 Author contributions:**

552 All authors have contributed to the design of this protocol. MK, NJH JHvdL, RB and RRG have  
553 initiated the project. The protocol was drafted by MK which was refined by NJH, JHvdL, RB, MO, NJB,  
554 LWEvH, and RRG. Statistical advice was provided by JHvdL. MK was responsible for drafting this  
555 manuscript. All authors have contributed to the manuscript and read and approved the final  
556 manuscript. The paediatric appendicitis COS development group consist of all local investigators who  
557 are responsible for translation, ethical board approval, participant recruitment. They have all read,  
558 refined and approved the final manuscript.

**560 Data sharing statement:**

561 The project is registered on the comet-initiative.org which is open access. The study findings will be  
562 presented in a report which will be submitted for publication in a relevant peer-reviewed journal to  
563 ensure dissemination to relevant healthcare professionals. Findings may also be submitted for  
564 presentation at local meetings or conferences. The protocol will be published on an open access  
565 repository.

567 **Funding statement:** This research received no specific grant from any funding agency in the public,  
568 commercial or not-for-profit sectors

569 **Competing interests statement:** None to declare



571 **REFERENCES**

572

- 573 1 Addiss DG, Shaffer N, Fowler BS, *et al.* the Epidemiology of Appendicitis and  
574 Appendectomy in the United States. *Am J Epidemiol* 1990;**132**:910–25.  
575 doi:10.1093/oxfordjournals.aje.a115734
- 576 2 Anderson JE, Bickler SW, Chang DC, *et al.* Examining a common disease with  
577 unknown etiology: trends in epidemiology and surgical management of appendicitis in  
578 California, 1995-2009. *World J Surg* 2012;**36**:2787–94. doi:10.1007/s00268-012-1749-  
579 z
- 580 3 Ferris M, Quan S, Kaplan BS, *et al.* The Global Incidence of Appendicitis. *Ann Surg*  
581 2017;**266**:237–41. doi:10.1097/SLA.0000000000002188
- 582 4 Georgiou R, Eaton S, Stanton MP, *et al.* Efficacy and Safety of Nonoperative  
583 Treatment for Acute Appendicitis: A Meta-analysis. *Pediatrics* 2017;;e20163003.  
584 doi:10.1542/peds.2016-3003
- 585 5 Huang L, Yin Y, Yang L, *et al.* Comparison of Antibiotic Therapy and Appendectomy  
586 for Acute Uncomplicated Appendicitis in Children. *JAMA Pediatr* 2017;**171**:426.  
587 doi:10.1001/jamapediatrics.2017.0057
- 588 6 Xu J, Adams S, Liu YC, *et al.* Nonoperative management in children with early acute  
589 appendicitis: A systematic review. *J Pediatr Surg* Published Online First: May 2017.  
590 doi:10.1016/j.jpedsurg.2017.05.003
- 591 7 Kessler U, Mosbahi S, Walker B, *et al.* Conservative treatment versus surgery for  
592 uncomplicated appendicitis in children: a systematic review and meta-analysis. *Arch*  
593 *Dis Child* 2017;;archdischild-2017-313127. doi:10.1136/archdischild-2017-313127
- 594 8 Gorter RR, The S-MML, Gorter-Stam MAW, *et al.* Systematic review of nonoperative  
595 versus operative treatment of uncomplicated appendicitis. *J Pediatr Surg* 2017;**18 Apr**  
596 **201**. doi:10.1016/j.jpedsurg.2017.04.005
- 597 9 Sinha I, Jones L, Smyth RL, *et al.* A Systematic Review of Studies That Aim to  
598 Determine Which Outcomes to Measure in Clinical Trials in Children. *PLoS Med*  
599 2008;**5**:e96. doi:10.1371/journal.pmed.0050096
- 600 10 Kirkham JJ, Dwan KM, Altman DG, *et al.* The impact of outcome reporting bias in  
601 randomised controlled trials on a cohort of systematic reviews. *BMJ* 2010;**340**:c365.



- 1  
2  
3 602 11 Pogue J, Yusuf S. Overcoming the limitations of current meta-analysis of randomised  
4 603 controlled trials. *Lancet (London, England)* 1998;**351**:47–52. doi:10.1016/S0140-  
5 604 6736(97)08461-4  
6  
7  
8  
9 605 12 Zanchetti A, Mancia G. Searching for information from unreported trials--amnesty for  
10 606 the past and prospective meta-analyses for the future. *J Hypertens* 1998;**16**:125.  
11  
12  
13 607 13 Hall NJ, Kapadia MZ, Eaton S, *et al.* Outcome reporting in randomised controlled trials  
14 608 and meta-analyses of appendicitis treatments in children: a systematic review. *Trials*  
15 609 2015;**16**:275. doi:10.1186/s13063-015-0783-1  
16  
17  
18 610 14 Clarke M. Standardising outcomes for clinical trials and systematic reviews. *Trials*  
19 611 2007;**8**:39. doi:10.1186/1745-6215-8-39  
20  
21  
22 612 15 Sherratt FC, Eaton S, Walker E, *et al.* Development of a core outcome set to  
23 613 determine the overall treatment success of acute uncomplicated appendicitis in  
24 614 children: a study protocol. *BMJ Paediatr Open* 2017;**1**:e000151. doi:10.1136/bmjpo-  
25 615 2017-000151  
26  
27  
28  
29 616 16 Sanderson T, Morris M, Calnan M, *et al.* What outcomes from pharmacologic  
30 617 treatments are important to people with rheumatoid arthritis? Creating the basis of a  
31 618 patient core set. *Arthritis Care Res (Hoboken)* 2010;**62**:640–6. doi:10.1002/acr.20034  
32  
33  
34  
35 619 17 Kirkham JJ, Davis K, Altman DG, *et al.* Core Outcome Set-STAndards for  
36 620 Development: The COS-STAD recommendations. *PLOS Med* 2017;**14**:e1002447.  
37 621 doi:10.1371/journal.pmed.1002447  
38  
39  
40 622 18 Williamson PR, Altman DG, Bagley H, *et al.* The COMET Handbook: version 1.0.  
41 623 *Trials* 2017;**18**:280. doi:10.1186/s13063-017-1978-4  
42  
43  
44 624 19 Kirkham JJ, Gorst S, Altman DG, *et al.* Core Outcome Set-STAndards for Reporting:  
45 625 The COS-STAR Statement. *PLoS Med* 2016;**13**:e1002148.  
46 626 doi:10.1371/journal.pmed.1002148  
47  
48  
49  
50 627 20 Staniszewska S, Brett J, Simera I, *et al.* GRIPP2 reporting checklists: tools to improve  
51 628 reporting of patient and public involvement in research. *BMJ* 2017;**358**:j3453.  
52  
53  
54 629 21 Protocol for the development of a global core outcome set for treatment of  
55 630 uncomplicated appendicitis in children :: Core Outcome Measures in Effectiveness  
56 631 Trials Initiative (COMET). <http://www.comet-initiative.org/studies/details/1119>  
57 632 (accessed 5 Mar 2018).  
58  
59  
60 633 22 Sinha IP, Smyth RL, Williamson PR. Using the Delphi Technique to Determine Which  
19

- 1  
2  
3 634 Outcomes to Measure in Clinical Trials: Recommendations for the Future Based on a  
4 Systematic Review of Existing Studies. *PLoS Med* 2011;**8**:e1000393.  
5 635  
6 636 doi:10.1371/journal.pmed.1000393  
7
- 8  
9 637 23 Liberati A, Altman DG, Tetzlaff J, *et al*. The PRISMA statement for reporting  
10 638 systematic reviews and meta-analyses of studies that evaluate health care  
11 639 interventions: explanation and elaboration. *J Clin Epidemiol* 2009;**62**:e1–34.  
12 640 doi:10.1016/j.jclinepi.2009.06.006  
13  
14  
15  
16 641 24 Boers M, Kirwan JR, Gossec L, *et al*. How to choose core outcome measurement sets  
17 642 for clinical trials: OMERACT 11 approves filter 2.0. *J Rheumatol* 2014;**41**:1025–30.  
18 643 doi:10.3899/jrheum.131314  
19  
20  
21 644 25 Mullen PM. Delphi: myths and reality. *J Health Organ Manag* 2003;**17**:37–52.  
22 645 doi:10.1108/14777260310469319  
23  
24  
25 646 26 Murphy MK, Black NA, Lamping DL, *et al*. Consensus development methods, and their  
26 647 use in clinical guideline development. *Health Technol Assess* 1998;**2**:i–iv, 1–88.  
27  
28  
29 648 27 COMET DelphiManager. 2017.<http://www.comet-initiative.org/delphimanager/>  
30 649 (accessed 4 Dec 2018).  
31  
32  
33 650 28 Guyatt GH, Oxman AD, Kunz R, *et al*. GRADE guidelines: 2. Framing the question  
34 651 and deciding on important outcomes. *J Clin Epidemiol* 2011;**64**:395–400.  
35 652 doi:10.1016/j.jclinepi.2010.09.012  
36  
37  
38  
39 653 29 Brookes ST, Macefield RC, Williamson PR, *et al*. Three nested randomized controlled  
40 654 trials of peer-only or multiple stakeholder group feedback within Delphi surveys during  
41 655 core outcome and information set development. *Trials* 2016;**17**:409.  
42 656 doi:10.1186/s13063-016-1479-x  
43  
44  
45  
46 657 30 Dodd S, Clarke M, Becker L, *et al*. A taxonomy has been developed for outcomes in  
47 658 medical research to help improve knowledge discovery. *J Clin Epidemiol* 2018;**96**:84–  
48 659 92. doi:10.1016/j.jclinepi.2017.12.020  
49  
50  
51  
52 660 31 Biggane AM, Brading L, Ravaud P, *et al*. Survey indicated that core outcome set  
53 661 development is increasingly including patients, being conducted internationally and  
54 662 using Delphi surveys. *Trials* 2018;**19**:113. doi:10.1186/s13063-018-2493-y  
55  
56  
57 663 32 Tsihlaiki A, O'Brien K, Johal A, *et al*. Development of a core outcome set for  
58 664 orthodontic trials using a mixed-methods approach: protocol for a multicentre study.  
59 665 *Trials* 2017;**18**:366. doi:10.1186/s13063-017-2098-x  
60

- 1  
2  
3 666 33 Allard A, Fellowes A, Shilling V, *et al.* Key health outcomes for children and young  
4 667 people with neurodisability: qualitative research with young people and parents. *BMJ*  
5 668 *Open* 2014;**4**:e004611. doi:10.1136/bmjopen-2013-004611  
6  
7  
8  
9 669 34 Morris C, Janssens A, Shilling V, *et al.* Meaningful health outcomes for paediatric  
10 670 neurodisability: Stakeholder prioritisation and appropriateness of patient reported  
11 671 outcome measures. *Health Qual Life Outcomes* 2015;**13**:87. doi:10.1186/s12955-015-  
12 672 0284-7  
13  
14  
15  
16 673  
17  
18 674  
19  
20  
21  
22  
23  
24  
25  
26  
27  
28  
29  
30  
31  
32  
33  
34  
35  
36  
37  
38  
39  
40  
41  
42  
43  
44  
45  
46  
47  
48  
49  
50  
51  
52  
53  
54  
55  
56  
57  
58  
59  
60

For peer review only

1  
2  
3 675 **Figures**  
4

5 676  
6

7  
8 677 **Figure 1. Schematic depiction of outcome term selection from systematic reviews**

9 678 *RCTs= Randomized controlled trials. SRs= Systematic reviews*  
10  
11  
12  
13  
14  
15  
16  
17  
18  
19  
20  
21  
22  
23  
24  
25  
26  
27  
28  
29  
30  
31  
32  
33  
34  
35  
36  
37  
38  
39  
40  
41  
42  
43  
44  
45  
46  
47  
48  
49  
50  
51  
52  
53  
54  
55  
56  
57  
58  
59  
60

For peer review only

1  
2  
3  
4  
5  
6  
7  
8  
9  
10  
11  
12  
13  
14  
15  
16  
17  
18  
19  
20  
21  
22  
23  
24  
25  
26  
27  
28  
29  
30  
31  
32  
33  
34  
35  
36  
37  
38  
39  
40  
41  
42  
43  
44  
45  
46  
47  
48  
49  
50  
51  
52  
53  
54  
55  
56  
57  
58  
59  
60

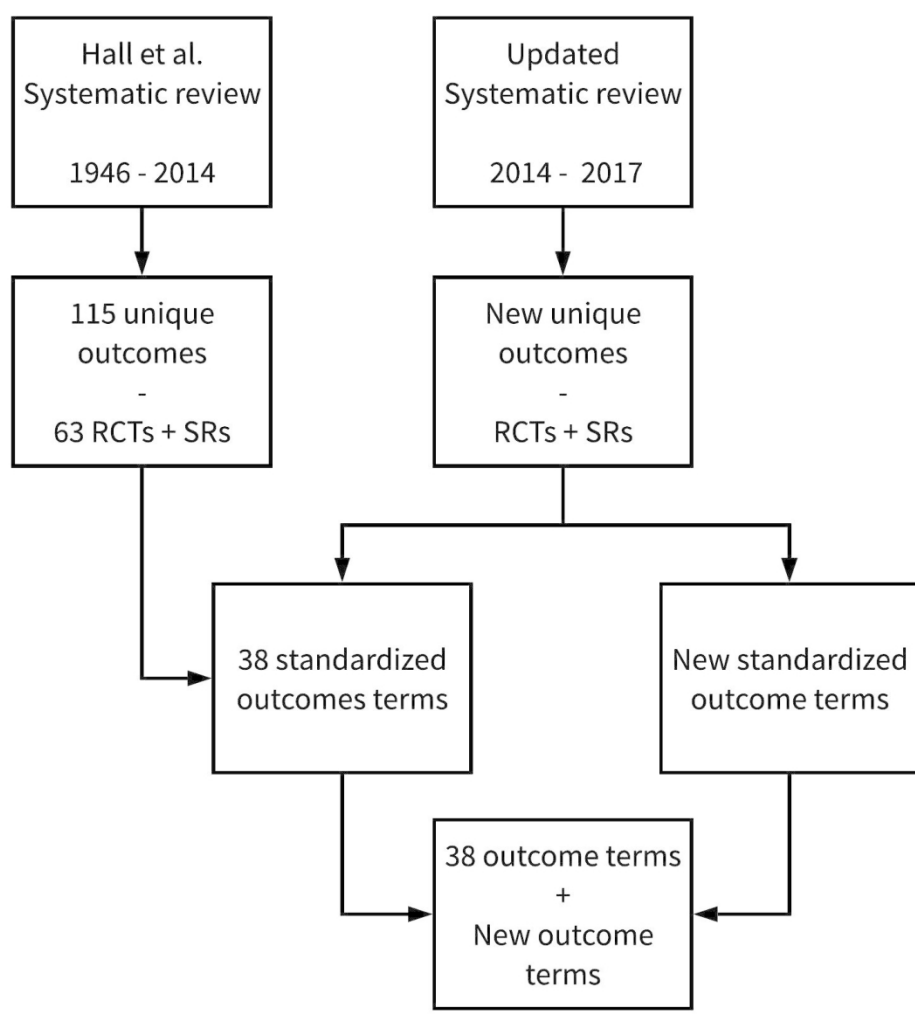

Figure 1. Schematic depiction of outcome term selection from systematic reviews  
RCTs= Randomized controlled trials. SRs= Systematic reviews

134x146mm (300 x 300 DPI)

1  
2  
3 **Online supplement 1.**  
4

5  
6 **S1. Completed COS-STAD checklist for PA-COS project**  
7

| Domain                | Methodology                                                                                    | Notes                                                                                                                                                                                                                       | Addressed on page number       |
|-----------------------|------------------------------------------------------------------------------------------------|-----------------------------------------------------------------------------------------------------------------------------------------------------------------------------------------------------------------------------|--------------------------------|
| Scope specification   | 1. The research or practice setting(s) in which the COS is to be applied                       | e.g., for application in research studies or for use in routine care                                                                                                                                                        | 4.                             |
|                       | 2. The health condition(s) covered by the COS                                                  | e.g., treatment of rheumatoid arthritis or screening for cancer                                                                                                                                                             | 4.                             |
|                       | 3. The population(s) covered by the COS                                                        | e.g., patients with advanced disease or children                                                                                                                                                                            | 4.                             |
|                       | 4. The intervention(s) covered by the COS                                                      | e.g., all interventions, drug therapy, or surgical interventions                                                                                                                                                            | 4.                             |
| Stakeholders involved | 5. Those who will use the COS in research                                                      | e.g., clinical trialists or industry                                                                                                                                                                                        | 6.                             |
|                       | 6. Healthcare professionals with experience of patients with the condition                     | e.g., clinical experts, practitioners, and investigators with particular experience in the condition                                                                                                                        | 6.                             |
|                       | 7. Patients with the condition or their representatives                                        | involve those who have experienced or who are affected by the condition (e.g., patients, family members, and carers).                                                                                                       | 6.                             |
| Consensus process     | 8. The initial list of outcomes considered both healthcare professionals' and patients' views. | consider the views of healthcare professionals and patients (most likely identified from literature reviews or interviews) when generating an initial list of outcomes for inclusion in the consensus process.              | 5.<br>(No patient involvement) |
|                       | 9. A scoring process and consensus definition were described a priori.                         | Although different consensus methods may be employed in different studies, to avoid any potential biases, COS developers should describe their consensus method a priori.                                                   | 7, 8, 9.                       |
|                       | 10. Criteria for including/dropping/adding                                                     | prespecify criteria for including, dropping, or adding new outcomes to avoid potential biases.                                                                                                                              | 7, 8, 9.                       |
|                       | 11. Care was taken to avoid ambiguity of language used in the list of outcomes.                | consider the language used when describing outcomes in front of different stakeholder groups. An example of 1 approach taken is to include both lay and medical terms, with these previously piloted with the stakeholders. | 7,8.                           |

## 1 Online supplement 2.

### 2 S2. Search strategy for systematic review PA-COS

#### 3 **Appendicitis**

4 "Appendix"[Mesh] OR appendix[tiab] OR appendix[ot] OR "Appendicitis"[Mesh] OR  
5 "Appendectomy"[Mesh] OR appendicit\*[tiab] OR appendicit\*[ot] OR appendectom\*[tiab] OR  
6 appendectom\*[ot] OR appendicectom\*[tiab] OR appendicectom\*[ot]

#### 7 **Children**

8 child\*[tw] OR schoolchild\*[tw] OR infan\*[tw] OR adolescen\*[tw] OR pediatri\*[tw] OR  
9 paediatr\*[tw] OR neonat\*[tw] OR boy[tw] OR boys[tw] OR boyhood[tw] OR girl[tw] OR  
10 girls[tw] OR girlhood[tw] OR youth[tw] OR youths[tw] OR baby[tw] OR babies[tw] OR  
11 toddler\*[tw] OR teen[tw] OR teens[tw] OR teenager\*[tw] OR newborn\*[tw] OR  
12 postneonat\*[tw] OR postnat\*[tw] OR perinat\*[tw] OR puberty[tw] OR preschool\*[tw] OR  
13 suckling\*[tw] OR picu[tw] OR nicu[tw]

#### 14 **3.2.2 Study selection**

15 Selection of studies will be performed by 2 independent reviewers (MK, JF) according to the  
16 below mentioned in- and exclusion criteria. In case of disagreement between two reviewers,  
17 a third independent reviewer (RG) will make the final decision.

##### 18 *Inclusion/Exclusion Criteria:*

19 All RCTs and systematic reviews/meta-analyses reporting the outcome of treatment of acute  
20 uncomplicated appendicitis will be included in this systematic review. By including systematic  
21 reviews that also report on non-comparative studies we expect to identify all reported  
22 treatment outcomes, including those from the relatively new field of non-operative  
23 management of uncomplicated appendicitis. Publications before January 2014 will be  
24 excluded. Only studies in children (<18 years of age) will be included. Studies only reporting  
25 on the outcome of treatment in complex or complicated appendicitis (gangrenous  
26 appendicitis, appendiceal mass, appendiceal abscess) will be excluded.

#### 27 **3.2.3 Data extraction**

28 The two reviewers will extract the data independently using the predefined data extraction  
29 form shown in Appendix A. In case of disagreement a third reviewer will make the final  
30 decision. A risk of bias assessment of the individual studies is not applicable as we will not  
31 be using individual study data but only the reported outcomes. As diversity in terminology will  
32 be anticipated, we decided to initially report all outcome measure as mentioned in the original  
33 study. Outcome measures will be mapped independently by two reviewers and in case of  
34 disagreement a third reviewer will make the final decision. After data extraction of all studies  
35 is completed, a meeting of the study management group will be held between to discuss  
36 potential similarity between the outcome measures in order to assign an appropriate term for  
37 them.



# BMJ Open

## Establishing a core outcome set for treatment of uncomplicated appendicitis in children: study protocol for an international Delphi survey.

|                                 |                                                                                                                                                                                                                                                                                                                                                                                                                                                                                                                                                                                                                                                                                                                                                                                                                                                                                                                                                                                                          |
|---------------------------------|----------------------------------------------------------------------------------------------------------------------------------------------------------------------------------------------------------------------------------------------------------------------------------------------------------------------------------------------------------------------------------------------------------------------------------------------------------------------------------------------------------------------------------------------------------------------------------------------------------------------------------------------------------------------------------------------------------------------------------------------------------------------------------------------------------------------------------------------------------------------------------------------------------------------------------------------------------------------------------------------------------|
| Journal:                        | <i>BMJ Open</i>                                                                                                                                                                                                                                                                                                                                                                                                                                                                                                                                                                                                                                                                                                                                                                                                                                                                                                                                                                                          |
| Manuscript ID                   | bmjopen-2018-028861.R2                                                                                                                                                                                                                                                                                                                                                                                                                                                                                                                                                                                                                                                                                                                                                                                                                                                                                                                                                                                   |
| Article Type:                   | Protocol                                                                                                                                                                                                                                                                                                                                                                                                                                                                                                                                                                                                                                                                                                                                                                                                                                                                                                                                                                                                 |
| Date Submitted by the Author:   | 17-Apr-2019                                                                                                                                                                                                                                                                                                                                                                                                                                                                                                                                                                                                                                                                                                                                                                                                                                                                                                                                                                                              |
| Complete List of Authors:       | Knaapen, Max; Emma Children's Hospital, Amsterdam UMC, University of Amsterdam, Vrije Universiteit, Paediatric Surgical Centre Hall, Nigel; University of Southampton Faculty of Medicine, University Surgery Unit<br>van der Lee, Johanna H.; Emma Children's Hospital, Amsterdam UMC, University of Amsterdam, Paediatric clinical Research Office<br>Butcher, Nancy; Sick Kids, Child Health Evaluative Sciences<br>Offringa, Martin; The Hospital for Sick Children, University of Toronto, Department of Paediatrics<br>Van Heurn, Ernst; Emma Children's Hospital, Amsterdam UMC, University of Amsterdam, Vrije Universiteit, Paediatric Surgical Centre<br>Bakx, Roel; Emma Children's Hospital, Amsterdam UMC, University of Amsterdam, Vrije Universiteit, Paediatric Surgical Centre<br>Gorter, Ramon; Emma Children's Hospital, Amsterdam UMC, University of Amsterdam, Vrije Universiteit, Paediatric Surgical Centre<br>+ On behalf of the paediatric , appendicitis COS development group |
| <b>Primary Subject Heading</b>: | Surgery                                                                                                                                                                                                                                                                                                                                                                                                                                                                                                                                                                                                                                                                                                                                                                                                                                                                                                                                                                                                  |
| Secondary Subject Heading:      | Emergency medicine, Gastroenterology and hepatology, Medical publishing and peer review, Paediatrics, Research methods                                                                                                                                                                                                                                                                                                                                                                                                                                                                                                                                                                                                                                                                                                                                                                                                                                                                                   |
| Keywords:                       | delphi, appendicitis, children, core outcome set, paediatric, Global                                                                                                                                                                                                                                                                                                                                                                                                                                                                                                                                                                                                                                                                                                                                                                                                                                                                                                                                     |
|                                 |                                                                                                                                                                                                                                                                                                                                                                                                                                                                                                                                                                                                                                                                                                                                                                                                                                                                                                                                                                                                          |

SCHOLARONE™  
Manuscripts

1  
2  
3  
4  
5  
6  
7  
8  
9  
10  
11  
12  
13  
14  
15  
16  
17  
18  
19  
20  
21  
22  
23  
24  
25  
26  
27  
28  
29  
30  
31  
32  
33  
34  
35  
36  
37  
38  
39  
40  
41  
42  
43  
44  
45  
46  
47  
48  
49  
50  
51  
52  
53  
54  
55  
56  
57  
58  
59  
60

## 1 Establishing a core outcome set for treatment of uncomplicated 2 appendicitis in children: study protocol for an international Delphi 3 survey.

4 Knaapen M, MD<sup>1</sup>, Hall NJ, MD, PhD<sup>2</sup>, Van der Lee JH, MD, PhD<sup>3</sup>, Butcher NJ, PhD<sup>4</sup>,  
5 Offringa M, MD, PhD<sup>4,5</sup>, Van Heurn, Ernst W.E, PhD<sup>1</sup>, Bakx R, MD, PhD<sup>1</sup>, Gorter RR, MD,  
6 PhD<sup>1</sup> + On behalf of the paediatric appendicitis COS development group

- 7  
8  
9  
10  
11  
12  
13  
14  
15  
16  
17  
18  
19  
20  
21  
22  
23  
24  
25  
26  
27  
28  
29  
30  
31  
32  
33  
34  
35  
36  
37  
38  
39  
40  
41  
42  
43  
44  
45  
46  
47  
48  
49  
50  
51  
52  
53  
54  
55  
56  
57  
58  
59  
60
1. Emma Children's Hospital, Amsterdam UMC, University of Amsterdam & Vrije  
Universiteit, Department of Paediatric Surgery, Amsterdam, The Netherlands. Electronic  
address: rr.gorter@vumc.nl / r.bakx@amc.uva.nl / m.knaapen@uva.amc.nl /  
e.vanheurn@amc.uva.nl
  2. University Surgery Unit, Faculty of Medicine, University of Southampton, Southampton  
General Hospital, Southampton, UK; Department of Paediatric Surgery and Urology,  
Southampton Children's Hospital, Southampton, UK. Electronic address:  
n.j.hall@soton.ac.uk
  3. Emma Children's Hospital, Amsterdam UMC, University of Amsterdam, Paediatric clinical  
Research Office, Amsterdam, The Netherlands. Electronic address:  
[j.h.vanderlee@amc.uva.nl](mailto:j.h.vanderlee@amc.uva.nl)
  4. Child Health Evaluative Sciences, The Hospital for Sick Children Research Institute,  
Toronto, Canada; Electronic address: nancy.butcher@sickkids.ca
  5. Department of Paediatrics, The Hospital for Sick Children, University of Toronto, Toronto,  
Canada. Electronic address: martin.offringa@sickkids.ca

Address correspondence to Max Knaapen, MD

Address: Emma Children's Hospital, Amsterdam UMC, University of Amsterdam, Vrije  
Universiteit, Paediatric Surgical Centre, Amsterdam. PO Box 22660, 1100DD  
Amsterdam, the Netherlands.

Email: M.Knaapen@AMC.UvA.nl

Telephone: +31-20-5665693

Word count: 5885

Funding statement: None

Competing interests statement: None to declare

## 34 **ABSTRACT**

### 35 **Introduction**

36 Appendicitis is a global disease affecting roughly one in every 12 people in the world, with  
37 the highest incidence between ages 10 and 19 years. To date, a wide variety of health  
38 outcomes have been reported in randomized controlled trials (RCTs) and meta-analyses  
39 evaluating treatments for appendicitis. This is especially the case in studies comparing non-  
40 operative treatment to operative treatment. A set of standard outcomes, to be reported in all  
41 future trials, is needed to allow for adequate comparison and interpretation of clinical trial  
42 results and to make data pooling possible. This protocol describes the development of such  
43 a global core outcome set (COS) to allow unified reporting of treatment interventions in  
44 children with acute uncomplicated appendicitis.

### 45 **Methods and analysis**

46 We use current international standard methodology for the development and reporting of this  
47 COS. Its development consists of three phases: (1) Update the most recent systematic  
48 review on outcomes reported in uncomplicated paediatric appendicitis research, to identify  
49 additional outcomes, (2) Three-step global Delphi study to identify a set of core outcomes for  
50 which there is consensus between parents and (paediatric) surgeons, and (3) Expert meeting  
51 to finalize the COS and its definitions. Children and young people will be involved through  
52 their parents during phase two and will be engaged directly using a customized face-to-face  
53 approach.

### 54 **Ethics and dissemination.**

55 The medical research ethics committee of the Academic Medical Centre Amsterdam has  
56 approved the study. Each participating country/research group will ascertain ethics board  
57 approval. Electronic informed consent will be obtained from all participants. Results will be  
58 presented in peer-reviewed academic journals and at (international) conferences.

### 59 **Registration details**

60 The COS development project was registered with the COMET initiative in February 2018  
61 (<http://www.comet-initiative.org/studies/details/1119>).

### 62 **Strengths and limitations of this study**

- 63 1. This protocol describes an international online Delhi study that should result in a globally  
64 relevant set of core outcomes for paediatric uncomplicated appendicitis.
- 65 2. The protocol was developed in conjunction with an international steering committee, patient  
66 representation and follows all relevant core outcomes set development guidelines and  
67 standards.
- 68 3. This study involves parents and patients in deciding what to measure in future  
69 uncomplicated appendicitis research.

1  
2  
3  
4  
5  
6  
7  
8  
9  
10  
11  
12  
13  
14  
15  
16  
17  
18  
19  
20  
21  
22  
23  
24  
25  
26  
27  
28  
29  
30  
31  
32  
33  
34  
35  
36  
37  
38  
39  
40  
41  
42  
43  
44  
45  
46  
47  
48  
49  
50  
51  
52  
53  
54  
55  
56  
57  
58  
59  
60

70 4. The involvement of young people in core outcome set development requires a customized  
71 approach. This protocol addresses this issue and describes a direct face-to-face  
72 involvement.  
73 5. Because of the global and multilingual aspect of the study there will be a limited  
74 consensus discussion with only selected individuals. Also, due to feasibility, the direct face-  
75 to-face engagement of young people will only take place in selected countries.

For peer review only

## 77 INTRODUCTION

78 Appendicitis is a common gastro-intestinal disease affecting roughly one in every 12 people  
79 in the world, with the highest incidence between ages 10 and 19 years[1,2]. While the  
80 incidence varies from country to country, appendicitis is a global disease[3]. In the last  
81 decade, there have been several developments in the treatment of appendicitis in children,  
82 with the most recent being non-operative treatment (NOT) for acute uncomplicated  
83 appendicitis. Studies investigating the effectiveness of NOT in children show promising  
84 results[4–7]. However, the selected primary (and secondary) outcomes vary widely, as  
85 reflected in recent systematic reviews assessing the efficacy and safety of NOT, which may  
86 contribute to their contradictory conclusions[4–8]. In the systematic review by Georgiou et  
87 al.[4], the need for universal outcome selection and reporting in appendicitis studies is  
88 emphasized. In general, it is recognized that clinical trials in children often lack outcomes that  
89 are appropriately chosen for this particular population[9].

90 Inconsistent selection and reporting of outcomes limits the ability to adequately compare and  
91 interpret clinical trial results. Furthermore, it hampers data pooling and subsequent meta-  
92 analysis. It also increases the risk of selective outcome reporting, a form of publication bias.  
93 This in turn jeopardizes the validity of results from individual trials, which feeds into  
94 subsequent systematic reviews[10] and meta-analyses, which are by nature retrospective,  
95 and therefore liable to various risks of bias[11,12].

96 As demonstrated by Hall et al. in 2015, a wide variety of outcomes has been reported in  
97 randomized controlled trials (RCTs) and meta-analyses reporting on the treatment of  
98 appendicitis in children[13]. In the 63 included studies, a total of 115 different outcomes were  
99 reported[13]. Hall et al. proposed the development of a Core Outcome Set (COS), which is a  
100 standardized collection of outcomes that should be measured and reported in all future  
101 trials[14]. Recently a study protocol was published for developing such a COS in the United  
102 Kingdom[15]. Because of the differences between countries in treatment practises, resources  
103 and cultural aspects it was decided, in conjunction with the UK COS research group, that  
104 there is a need for an international COS, to be used in all trials assessing the treatment of  
105 acute uncomplicated appendicitis in children. The development of the current international  
106 protocol was performed in conjunction with the UK research group. Its principal investigator  
107 (NJ Hall) has been involved in its development and is part of the study management group.

108 Outcomes considered important by patients and families are essential to a meaningful and  
109 complete COS[16]. That is why parents and patients play a central role in the consensus  
110 process as a stakeholder group. Parent and patient representation was ensured through  
111 involvement of the Dutch patient and parent Foundation: “Children and Hospital”. A

1  
2  
3 112 representative from this group provided feedback from the perspective of parents and  
4 113 children in several stages of the protocol development. They are also involved in the  
5 114 development of a face-to-face methodology for engaging children in this COS project.

## 8 9 115 **Scope**

10  
11 116 We aim to reach a global consensus amongst patients, parents, researchers and physicians  
12 117 on a minimal set of core outcomes that should be measured and reported in all future clinical  
13 118 trials investigating any type of treatment for acute uncomplicated appendicitis in children,  
14 119 including surgical treatment, non-operative treatment or other treatments aimed at curing  
15 120 appendicitis.

## 19 20 121 **METHODS**

21  
22 122 In the development of this protocol, we adhere to the COS-STAD (Core Outcome Set-  
23 123 STAndards for Development) recommendations[17] and the COMET (Core Outcome  
24 124 Measures in Effectiveness Trials) handbook[18]. The completed COS-STAD checklist can be  
25 125 found in online supplement S1. The final core outcome set will be reported in accordance  
26 126 with the COS-STAR (COS-STAndaRds for reporting) statement[19]. Involvement of patients  
27 127 and the public will be described using the GRIPP2 reporting checklist[20] (Guidance for  
28 128 Reporting on Involvement of Patients and Public). This study was registered with the COMET  
29 129 initiative (registration number: 1119) on February 11, 2018[21].  
30 130

### 35 36 131 **Study design**

37  
38 132 The paediatric appendicitis COS (PA-COS) development will consist of three phases: (1) An  
39 133 update of the 2015 systematic review on outcomes reported in uncomplicated paediatric  
40 134 appendicitis research[13]. Aiming to identify any additional outcomes used in trials that were  
41 135 published since the previous systematic review; (2) A three-step Delphi study to identify a set  
42 136 of core outcomes from those selected in the literature review. Development of the Delphi is  
43 137 performed according to the checklist by Sinha et al.[22] on the design and reporting of Delphi  
44 138 studies concerning COS selection; and (3) An expert panel meeting including physicians,  
45 139 researchers and children/parent representatives in order to ratify the final COS. Children and  
46 140 young people will be involved through their parents during phase two and will be engaged  
47 141 directly using a customized approach.  
48 142

### 55 56 143 **Steering Committee**

57  
58 144 An international steering committee has been established and consists of the following; the  
59 145 authors, a parent/patient representative of the Dutch Foundation: "Children and Hospital",

1  
2  
3 146 and the lead local investigator of each participating centre (paediatric appendicitis COS  
4 147 development group). The steering committee will agree on the final version of the protocol at  
5 148 the start of the project and will provide input throughout the duration of the project. The  
6 149 steering committee members will also be involved in the development of the final COS.  
7  
8 150 Within the steering committee, a smaller study management group has been appointed  
9 151 which will convene during regular (videoconference) meetings.

## 13 152 **Systematic review: Treatment outcomes**

16 153 Hall et al. performed a systematic review of RCTs and meta-analyses reporting treatment  
17 154 outcomes of children with appendicitis up to April 2014[13]. They reported 115 unique  
18 155 outcomes which were collapsed into a total of 38 standardized outcome terms. We will  
19 156 update the systematic review in order to identify any new unique outcomes in clinical trials or  
20 157 systematic reviews. All RCTs and systematic reviews/meta-analyses reporting treatment  
21 158 outcomes of acute uncomplicated appendicitis in children (<18 years of age) published  
22 159 between January 1<sup>st</sup> 2014 and November 23<sup>th</sup> 2017 will be included. The final review will  
23 160 follow the PRISMA reporting guideline[23]. We will search the Cochrane Central Register of  
24 161 Controlled Trials, MEDLINE and EMBASE with the help of a clinical librarian. Additional  
25 162 information on the search strategy/study selection and data extraction can be found in online  
26 163 supplement S2. Studies only reporting outcomes of treatment in complex or complicated  
27 164 appendicitis (for example - gangrenous or perforated appendicitis, appendiceal mass,  
28 165 appendiceal abscess) will be excluded.

36 166 After data extraction, a meeting of the study management group (including NJ Hall) will be  
37 167 held to discuss potential similarities between the outcomes from the 2015 systematic review  
38 168 from Hall et al.[13]. New unique outcomes will be discussed within the group in order to  
39 169 assign an appropriate standardized outcome term. If these outcomes do not match any of the  
40 170 original 38 outcome terms a new term will be assigned, this methodology is illustrated in  
41 171 figure 1. The new and original outcome terms will be mapped to four core areas (death, life  
42 172 impact, resource use, pathophysiological manifestations) in accordance with the methods  
43 173 from the OMERACT FILTER 2.0[24]. Although Hall et al.[13] chose to list the adverse events  
44 174 as a separate core area, we will reclassify these outcome terms to one of the four core areas  
45 175 (Table 1.). Adverse events of treatment will, however, be labelled separately, as the  
46 176 OMERACT filter suggests[24]. A meeting of the study management group will be held to  
47 177 discuss potential similarities between outcomes and to assign appropriate common outcome  
48 178 terms for corresponding outcomes. Outcomes that are only found once and are not  
49 179 generalizable can be excluded (e.g. the width of lateral thermal damage of the  
50 180 mesoappendix after appendectomy). Grouping the outcomes under a common outcome term  
51 181 aims to arrive at a manageable and cohesive list of outcomes that is appropriate as a basis



182 for the Delphi questionnaire.

183 **Table 1. Outcome Core Areas**

| Core Area                         | Example(s)                                                                                                      |
|-----------------------------------|-----------------------------------------------------------------------------------------------------------------|
| Life impact                       | <i>Quality of life, loss of ability to work</i>                                                                 |
| Resource use                      | <i>Length of hospital stay, healthcare costs, societal cost</i>                                                 |
| Pathophysiological Manifestations | <i>Biochemical parameters, organ function, (ir)reversible manifestations (complications, pathology results)</i> |
| Death                             | <i>Death</i>                                                                                                    |

184

## 185 Stakeholders and recruitment

### 186 1) Children and Young People

187 Children and young people (5-18 years) who have been treated for acute  
 188 uncomplicated appendicitis in the preceding 24 months, either with initial NOT or with  
 189 surgery. Children less than 5 years old are excluded as different outcomes might be  
 190 appropriate in this very young age group. Also, uncomplicated appendicitis is much  
 191 less common in young children than in older children. Furthermore, there are no  
 192 studies in which children below the age of 5 are treated non-operatively. Children will  
 193 be engaged indirectly as we will urge parents to discuss the answers they provide  
 194 with their child whilst filling out the Delphi questionnaire. Young people will be  
 195 engaged directly through a customized face-to-face approach in selected countries.  
 196 For the invited children, considering the complexity of the subject and methodology,  
 197 age is limited to 12-18 years.

198

### 199 2) Parents

200 Parents of children and young people (5-18 years) treated for acute uncomplicated  
 201 appendicitis either with initial NOT or with surgery in the preceding 24 months or  
 202 during the initial phase of the study. Parents will be asked to discuss the answers  
 203 they provide with their child whilst filling out the Delphi questionnaire. Parents will be

1  
2  
3 204 invited to participate by their child's treating physician or their designate in each  
4 205 participating country/hospital. Participants will be identified retrospectively by  
5 206 contacting patients that were treated in the past 24 months or prospectively by  
6 207 inviting parents to participate after their child has completed its treatment.  
7  
8 208

### 11 209 **3) (Paediatric) Surgeons**

12 210 General and/or paediatric surgeons who care for children in the specified age group  
13 211 will be asked to participate. Surgeons will be identified and invited by the local  
14 212 coordinators in each participating country. These local coordinators are research  
15 213 groups that have previously registered a clinical trial on uncomplicated appendicitis in  
16 214 children. This should allow for inclusion of physicians that also have experience in  
17 215 research on the treatment of appendicitis.  
18  
19  
20  
21  
22 216

#### 23 217 **Participating countries and research groups**

24 218 It was decided to invite research groups that are currently conducting clinical trials on the  
25 219 treatment of acute uncomplicated in children. Groups were identified through  
26 220 [www.clinicaltrials.gov](http://www.clinicaltrials.gov) by searching (January 2017) for 'appendicitis' with an age limitation of  
27 221 5-18 years. Studies with a mixed population (children and adults) were excluded. Studies  
28 222 that had been completed before 2014, had not been updated since 2015, or with incomplete  
29 223 registrations, were excluded. We found 111 trials, of which 12 trials assessed the treatment  
30 224 of uncomplicated appendicitis in children. Groups from the Netherlands, USA, Canada,  
31 225 Australia, Sweden, Finland, UK, France, Italy, Israel, Japan, Singapore and Malaysia were  
32 226 identified. Some trials included hospitals from multiple countries.  
33  
34  
35  
36  
37  
38  
39

#### 40 227 **Sample size**

41  
42  
43 228 There is no rationale for determining the number of respondents to invite for a Delphi  
44 229 study[18]. A minimum of seven respondents per stakeholder group is suggested to have a  
45 230 large enough group to allow for a consensus process[25]. Taking into account that only some  
46 231 invited participants will register for the Delphi and not all respondents will complete all rounds  
47 232 of the Delphi study (attrition), a minimum of 40 respondents per stakeholder group, per  
48 233 country will be invited. There will be no maximum. In case the number of respondents per  
49 234 country is significantly higher than other countries, we will consider a weightage per country  
50 235 in the analyses. We anticipate that this sample will be large enough to reflect all relevant  
51 236 opinions.  
52  
53  
54  
55  
56  
57  
58  
59  
60

#### 237 238 **Delphi study**

239 International online Delphi study

1  
2  
3 240 The Delphi method is an effective tool for reaching consensus in a large group without the  
4 241 need for face-to-face contact[26]. The use of sequential questionnaires which are answered  
5 242 anonymously by stakeholders is an established method for reaching consensus in a group of  
6 243 experts[22]. Questionnaires will be sent using DelphiManager[27], a web-based system  
7 244 designed for Delphi studies. The questionnaires will be open simultaneously to all  
8 245 respondents of the participating countries. After each round, the aggregated responses of all  
9 246 participants are shared anonymously in accordance with the Delphi principle.

14  
15 247 The list of outcomes from the systematic review will be formatted into questions,  
16 248 accompanied by an extensive plain language summary per outcome, including figures if  
17 249 appropriate. The Delphi questionnaire will originally be formulated in English and will be  
18 250 translated if required. Translation will only be performed by native speaking professionals.

21  
22 251 Participants will be asked to score the importance of each outcome using a 1 to 9 Likert  
23 252 scale as recommended by the Grading of Recommendations Assessment, Development and  
24 253 Evaluation (GRADE) working group[28] and COMET initiative[18]. A score of 7-9 indicates a  
25 254 critical outcome for assessing the effect of a treatment, 4-6 important but not critical, 1-3  
26 255 indicates an outcome with low importance for assessing the treatment effect. It will also be  
27 256 possible to select an “unable to score” option, which is especially of importance in case  
28 257 parents do not feel equipped to score certain outcomes. The questionnaires, including the  
29 258 plain language summaries, will be piloted by a group of laypersons (n=10) to check for  
30 259 ambiguity and readability.

#### 36 260 Delphi round one

37 261 Participants will be divided into two stakeholder groups: parents (with their children), and  
38 262 surgeons. Parents will be asked to discuss the answers they provide with their child whilst  
39 263 filling out the Delphi questionnaire. Baseline characteristics (age, country) will be  
40 264 ascertained. Parents will be asked if their child was treated with non-operative or operative  
41 265 treatment, time between registration and the first diagnosis of appendicitis and if their  
42 266 treatment was with or without complications. They will also be asked whether they will be  
43 267 answering the Delphi together with their child. Surgeons will be asked their speciality  
44 268 (paediatric, general, abdominal, other), workplace (academic, teaching hospital, non-  
45 269 teaching hospital), experience with non-operative treatment and experience in research  
46 270 regarding appendicitis in children.

54  
55 271 All participants will be asked to score all previously identified outcomes according to their  
56 272 perceived importance for assessing the treatment effect. In the first round there will be an  
57 273 option to suggest additional outcomes not yet listed.

58  
59  
60 274 Participants will have between four and eight weeks to complete each round, depending on

1  
2  
3 275 the response rate. In that time they will receive a reminder email every two weeks as long as  
4 276 they have not replied to the questionnaire.

5  
6  
7 277

8 278 Delphi round one: analysis

9  
10 279 Results will be analysed **by stakeholder group and for all participants** using descriptive  
11 280 statistics. Outcomes will be analysed separately for each stakeholder group, as there is  
12 281 evidence that patients are likely to assign importance to outcomes differently than  
13 282 surgeons[29], which has the potential to influence eventual outcome selection.

14  
15  
16  
17 283 “Consensus-in” will be defined as:

- 18  
19 284 – Greater than 70% of participants in **both** stakeholder groups scoring the outcome as  
20 285 7-9 and less than 15% in **both** stakeholder groups scoring the outcome as 1-3.
- 21  
22  
23 286 – Greater than 90% of participants within **one** stakeholder group scoring the outcome  
24 287 as 7-9. This implies that these outcomes are highly regarded by an individual  
25 288 stakeholder group, and should also be included[18].

26  
27  
28  
29 289 “Consensus-out” will be defined as:

- 30  
31 290 – Greater than 70% of participants in **both** stakeholder groups scoring the outcomes as  
32 291 1-3 and less than 15% of participants in **both** stakeholder groups scoring the  
33 292 outcome as 7–9. Consensus-out can only be reached when there is consensus  
34 293 across **both** stakeholder groups.

35  
36  
37  
38 294 Outcomes that do not meet any of these criteria will be defined as “no consensus”. A  
39 295 stratified analysis will be performed to check for skewing as a result of divergent opinions  
40 296 from a single country, or surgeons with or without research experience.

41  
42  
43  
44 297 At the end of round one, there will be a meeting of the study management group to assess  
45 298 whether an alteration in the Delphi study is appropriate. If additional outcomes are suggested  
46 299 by Delphi participants, each outcome will be assessed by the study management group to  
47 300 determine whether it is indeed new and to which category it should be classified. Wording of  
48 301 the Delphi questionnaire will be adjusted if misinterpretation is suspected.

49  
50  
51  
52  
53 302 Delphi rounds two and three

54 303 All participants that complete the previous round will be asked to participate in the next  
55 304 round. Only outcomes that have not yet been defined as “consensus-in” or “consensus-out”  
56 305 during the previous round will be presented in the following rounds to **all** participants.  
57 306 Outcomes for which there was only “consensus-in” within a single stakeholder group, will still  
58 307 be presented to the other stakeholder group to evaluate whether consensus can be achieved

1  
2  
3 308 in both stakeholder groups. An overview of included and excluded outcomes will be  
4 309 available. The outcomes for which there is no consensus and the newly suggested outcomes  
5 310 from the previous rounds will be presented with the participants' individual score and the  
6 311 median scores from each stakeholder group combined with a histogram showing the scoring  
7 312 distribution. Participants will be asked to score all remaining outcomes in the same manner  
8 313 as in round one.

#### 13 314 Delphi rounds two and three analysis

15 315 Results will be analysed per stakeholder group and for all participants, using descriptive  
16 316 statistics, including a stratified analysis. The same definitions for consensus in/out as in the  
17 317 first Delphi round are upheld. After the second round, there will be a meeting of the study  
18 318 management group to assess the need for alterations in the Delphi study, and to decide  
19 319 whether or not to proceed with a third Delphi round, assuming consensus between **both**  
20 320 stakeholder groups on more than 80% of the outcomes, and more than five outcomes with  
21 321 consensus in. To give an estimate of the degree of agreement between respondents, the  
22 322 width of the interquartile range of the median ranking score will be calculated, potentially  
23 323 ranging from 0.00, meaning complete agreement, to 8.00, meaning least possible  
24 324 agreement. This will be calculated for both the individual stakeholder groups as well as the  
25 325 entire group of respondents after the final round.

#### 33 326 **Face-to-face engagement of young people**

35 327 We wish to check for discrepancies of opinion between parents answering the Delphi  
36 328 together with their child and children who are interviewed directly. For this, a form of in-  
37 329 person interaction will be organised with young people (12-18 years) who have been treated  
38 330 for appendicitis. They will be asked to comment on the preliminary COS selection  
39 331 established at the end of the Delphi study, and to suggest additional outcomes and comment  
40 332 on outcomes that did not make the preliminary COS selection. This will either be done by a  
41 333 short, face-to-face, one round questionnaire involving only outcomes relevant to  
42 334 children/young people, or in the form of a small consensus meeting (prioritization meeting)  
43 335 before finalizing the definitive COS. Doing this type of research requires experienced  
44 336 interviewers and resources. That is why the face-to-face engagement will only take place in  
45 337 selected countries, however, we will aim to involve as many countries as feasible. Separate  
46 338 ethical board approval will be obtained as appropriate.

#### 55 339 **Consensus discussion**

57 340 If adequate consensus (we aim to achieve consensus on at least one outcome per  
58 341 OMERACT core area) is reached in the Delphi study, we will organise a face-to-face expert  
59 342 panel meeting with selected individuals with the purpose to ratify a pragmatic and well-

1  
2  
3 343 defined set of outcomes. A secondary aim of this meeting is to enhance support and  
4 344 implementation of the final COS.

6  
7 345 The meeting will be held at an international conference for paediatric surgery. Through  
8 346 purposive sampling, approximately 30 “experts” from across all stakeholder groups, including  
9 347 physicians, researchers and children/parent representatives, will be invited to participate in a  
11 348 face-to-face meeting with the Steering Committee. Journal editors and healthcare  
12 349 commissioners will also be invited to attend in an observational capacity with the purpose of  
13 350 promoting implementation and to provide comments on the final list of outcomes.

16  
17 351 In the event that adequate consensus cannot be reached in the Delphi process, we will  
18 352 organise a formal face-to-face consensus meeting or teleconference. In that case, we will  
19 353 select an appropriate representation of all stakeholder groups from the panel members that  
20 354 participated in the Delphi study.

### 23 355 **Final COS development**

24  
25  
26  
27 356 The goal is to achieve a pragmatic COS that is applicable and feasible for all future trials that  
28 357 evaluate the treatment of uncomplicated appendicitis in children. There is no recommended  
29 358 maximum number of outcomes that should be included in a COS. However, if the final COS  
30 359 includes too many outcomes, the COS would not be feasible to use in practice. To achieve the  
31 360 goal of a pragmatic COS we aim to arrive at a maximum of 10 outcomes, the same  
32 361 maximum number as the UK COS protocol specifies[15]. As a minimum, we aim to have at  
33 362 least one outcome per core area. If the number of outcomes for which consensus is achieved  
34 363 greatly exceeds 10 outcomes, the outcomes with the highest level of consensus will be  
35 364 considered part of the suggested COS. However, we will report all outcomes for which  
36 365 consensus is achieved. The highest level of consensus depends on whether there is  
37 366 consensus in both stakeholder groups, the median score that was appointed to the outcome,  
38 367 and the interquartile range of the median score as an estimate of the degree of consensus.

39  
40  
41  
42  
43  
44  
45  
46  
47 368 Only outcomes for which consensus is reached internationally will be selected. To test for  
48 369 country bias, stratified analyses of the Delphi results will be performed. The results from the  
49 370 face-to-face engagement of young people will be taken into account for the final COS  
50 371 selection and will be reported separately. If there is no consensus between patients, parents  
51 372 and healthcare professionals, an outcome can still be selected if there is clear consensus  
52 373 within a single stakeholder group. These will be reported separately. The final COS will be  
53 374 categorised according to the four core areas of the OMERACT filter[24]. We will also  
54 375 annotate the outcomes according to the recently published outcome taxonomy to maximise  
55 376 future data harmonisation[30].



## 377 **Patient and Public Involvement**

378 Patient involvement is at the core of this study design. By asking parents and patients with  
379 experience in having uncomplicated appendicitis what outcomes they feel should be part of  
380 future research. To ensure our design is appropriate for parents and children we have  
381 involved the Dutch child and parents representation group as part of the steering committee.  
382 In that capacities they provide input on the protocol and the study. To make sure the Delphi  
383 questionnaire is understandable and has no ambiguities it is checked by a group of  
384 laypersons before the start of the Delphi study. Part of the Delphi study is giving feedback to  
385 all its participants after each round, this will also be done with the final study results.

## 386 **Ethics and dissemination.**

### 387 Ethics

388 The medical research ethics committee of the Academic Medical Centre Amsterdam  
389 confirmed that the Dutch Medical Research Involving Human Subjects Act (WMO) does not  
390 apply to this study and that complete approval of this study by the committee is not required.  
391 Each participating country/research group will be asked to obtain ethics board approval or  
392 confirm that ethics board approval it not required. Electronic informed consent will be  
393 obtained from all participants. The face-to-face engagement of young people (12-18 years)  
394 will take place in selected countries and separate ethics board approval will be obtained, as  
395 appropriate.

### 396 Data collection and confidentiality

397 All data will be handled confidentially and in accordance with the Dutch Personal Data  
398 Protection Act and the European General Data Protection Regulation (GDPR).  
399 DelphiManager[27] will be used for the online questionnaire. After informed consent from all  
400 participants only limited identifying information (name, email) will be ascertained during  
401 registration. This information will be stored separately from the answers given in the  
402 questionnaire and will only be used for the purpose of direct feedback and reminder emails.  
403 Access to personally identifiable data will be strictly limited.

### 404 Study status and dissemination

405 In the first quarter (Q1) of 2018 the following 13 countries were invited to participate in the  
406 project; Netherlands, USA, Canada, Australia, Sweden, Finland, UK, France, Italy, Israel,  
407 Japan, Singapore and Malaysia. Ten countries replied, Italy, Israel and Japan did not. In Q1  
408 2018 the systematic review was finished. In Q2 2018 the Delphi questionnaire was  
409 developed and piloted. In Q3 2018 all materials were translated. Between Q4 2018 and Q1  
410 2019 IRB applications were submitted in 10 countries and 15 participating centres. The  
411 anticipated start of the online Delphi study is May 2019. We anticipate to have the final COS

1  
2  
3 412 ready by Q1 2020. Dissemination of the results will be accomplished by publication in an  
4 413 international peer-reviewed scientific journal and by presentations at (international)  
5 414 conferences. By involving the majority of the principal investigators who are currently  
6 415 involved in research on uncomplicated appendicitis in children, we aim to optimize uptake of  
7 416 the final COS. By involving journal editors and healthcare commissioners in the face-to-face  
8 417 consensus discussion, we aim to ultimately have the COS introduced as a requirement in  
9 418 future outcome reporting on the treatment of uncomplicated appendicitis in children. We will  
10 419 also actively send out the final COS to relevant journal editors and funding bodies to promote  
11 420 uptake in future research.

## 421 **DISCUSSION**

### 422 **Strengths and limitations of this study**

#### 423 **Outcomes selection**

424 The selection of potential outcomes will be done systematically and will provide a selection  
425 for the first Delphi questionnaire that reflects most issues pertinent to the treatment of  
426 uncomplicated appendicitis. By including systematic reviews/meta-analyses that also report  
427 on non-comparative studies, we expect to identify all reported treatment outcomes, including  
428 those from the relatively new field of NOT for uncomplicated appendicitis.

429 To be able to arrive at a manageable list of outcomes that is appropriate for a Delphi study,  
430 the number of outcome terms needs to be somewhat limited. In order to achieve this, the  
431 outcomes derived from our systematic review will be merged in case of similarity. If  
432 outcomes are not generalizable and only reported once, they will be excluded. This will be  
433 proposed and prepared by two independent reviewers and discussed in the study  
434 management group. However, the merging of outcomes will inevitably lead to some loss of  
435 detail.

#### 436 **Global consensus**

437 In order to reflect the views of different stakeholders, a variety of groups will be part of the  
438 development of this COS. This is not only the case on a national level, but also on an  
439 international level, related to, for example, differences between countries in resources,  
440 treatment practises for acute uncomplicated appendicitis, and cultural differences. For  
441 example there is a large difference with regard to the standard length of hospital stay after an  
442 appendectomy for uncomplicated appendicitis. In the USA much effort is devoted to reduce  
443 the number of admission days, in the UK there is only limited attention for the duration of  
444 admission and for instance in Japan an admission for 5 days is not uncommon. We can  
445 expect that these kind of differences result in different opinions regarding the core outcomes  
446 set. By also involving patients and parents from the participating countries we hope to correct

1  
2  
3 447 for these differences[31]. In conjunction with the UK paediatric appendicitis COS research  
4 448 group we decided that an international validation of the UK COS would not give the depth of  
5 449 information and would not allow for consensus formation on all possible outcomes. Which we  
6 450 feel is appropriate considering the before mentioned significant differences between  
7  
8 451 countries. Involving members from different countries will not only lead to the development of  
9 452 a COS that reflects the opinions of the international community, it should also lead to an  
10 453 internationally applicable “minimal” COS. However, selecting the participating countries on  
11 454 the basis of their involvement in research on appendicitis in children is a limitation. This  
12 455 choice was made on the basis of feasibility. Researchers in the field of uncomplicated  
13 456 appendicitis have an interest in the development of a COS and have the network to help  
14 457 carry out the Delphi study. With our current selection we will still have participants from four  
15 458 different continents. Our method of country selection has another advantage. Since non-  
16 459 operative treatment is an important research subject in childhood appendicitis, we aim to  
17 460 include surgeons and parents who have experience in that field. As non-operative treatment  
18 461 is still experimental in most of the world, we also need surgeons and patients who have been  
19 462 involved in such research.

### 29 463 **Limited face-to-face consensus**

30 464 If consensus is reached in the Delphi study we will not be organising a formal consensus  
31 465 meeting. The Delphi method can be used for reaching consensus in a group of respondents  
32 466 without the need for face-to-face contact. There is a risk of bias if a face-to-face consensus  
33 467 meeting leads to selection of only participants who are able to attend the meeting, which is  
34 468 especially a problem in a global consensus procedure. There are also problems regarding  
35 469 language barriers in an international consensus meeting. To check for interpretation errors in  
36 470 the Delphi method and to ensure a pragmatic and well-defined set of outcomes the results of  
37 471 the Delphi study will be discussed in an (international) expert meeting. The influence of this  
38 472 meeting on which outcomes are selected for the final COS is however very limited, as this  
39 473 selection is primarily made in the Delphi study.

### 47 474 **Involving parents and their children**

48 475 Involving patients in COS development has recently become common practice with 88%  
49 476 (n=112 as of April 12<sup>th</sup> 2016) of ongoing COS development studies doing so[18]. Involving  
50 477 patients as participants seems imperative as patients may select different outcomes,  
51 478 compared to physicians[16]. For this protocol we performed a scoping review [unpublished  
52 479 work] that found 12 studies that directly engaged children in COS development. Either as  
53 480 part of the advisory group or the steering committee, or as a stakeholder group in the  
54 481 Delphi[15,22], focus groups[32], interviews[33] or as a part of the consensus meeting[34].  
55 482 Attempts to engage children and young people in an online Delphi questionnaire have

1  
2  
3 483 proven to be difficult. In the UK COS for uncomplicated appendicitis, there were substantial  
4 484 difficulties with retaining young people in the consecutive rounds of the Delphi questionnaire,  
5 485 despite extensive efforts to optimize the methodology to appeal to children and young  
6 486 people, including: preliminary semi-structured interviews on the subject, pre-testing of the  
7 487 Delphi survey by young people and children[15] and video animations explaining the need for  
8 488 a COS. Parent participation however showed more promising results. Consequently, to  
9 489 safeguard the input of children/young people, the Delphi questionnaire for this study will be  
10 490 developed to be completed by parents with input from their children (5-18 years) whenever  
11 491 possible. In order to ensure that there are no large discrepancies between the opinions of  
12 492 parents together with their child, and with children without their parents, we will organize a  
13 493 form of in-person interaction with young people (12-18 years) who have been treated for  
14 494 appendicitis. Involving children/young people in COS development is a subject of interest in  
15 495 many ongoing COS development projects. As the search for the optimal approach to engage  
16 496 young people is ongoing we have not yet selected a final methodology. Two members of the  
17 497 study management group are currently involved in group that is developing such  
18 498 methodology in consultation with young people themselves. We will update our protocol as  
19 499 soon as we settle on a methodology before starting the face-to-face engagement. The  
20 500 updated protocol will be published on an online, open source format (via the Open Science  
21 501 Framework).

22  
23  
24  
25  
26  
27  
28  
29  
30  
31  
32  
33  
34 502 A limitation is that due to the international nature of our study it will not be feasible to engage  
35 503 children directly in all the participating countries. That is why the face-to-face engagement  
36 504 will take place in selected countries.

### 37 38 39 505 **Other stakeholders**

40  
41 506 After careful consideration and consultation with the participating countries, it was decided  
42 507 not to include paediatricians, general practitioners, nurses or emergency medicine  
43 508 physicians. Although all these specialists play an intricate role in the diagnosis and care for  
44 509 children with appendicitis, they do not make the final decision regarding treatment or its  
45 510 provision. We will however, depending on the organisation of the healthcare system in each  
46 511 country, ask these stakeholders to comment on the final COS in order to ensure that  
47 512 essential outcomes are not missed. Since almost all research regarding treatment of  
48 513 paediatric uncomplicated appendicitis is initiated by (paediatric) surgeons, it was decided that  
49 514 researchers will not be included as a separate individual stakeholder group. However,  
50 515 involvement in research will be registered. Whilst their opinion is vital to the development of a  
51 516 COS, it is likely researchers will be well represented in the (paediatric) surgeon stakeholder  
52 517 group. A stratified analyses will be performed to check for skewing of the results by surgeons  
53 518 involved in research. It was also decided not to include journal editors or healthcare

1  
2  
3 519 commissioners. Even though their opinion is of great importance especially regarding  
4 520 implementation, it was determined that their opinion is not essential in establishing the  
5 521 outcomes selected for the COS. Also there is much variability between countries regarding  
6 522 the role of these stakeholders, which would lead to major challenges regarding Delphi  
7 523 analyses of such a small stakeholder group. However, to enhance implementation and  
8 524 because of their expertise on the use of COSs, representatives of these stakeholder groups  
9 525 will be asked to attend the final consensus discussion.  
10  
11  
12  
13  
14

### 15 526 **Outcome measures**

16 527 This study will not answer the question on how to measure the outcomes that are included in  
17 528 the final COS, or at what time point the outcomes should be measured. We will however  
18 529 attempt to come to a clear definition of each outcome. We expect that further research will be  
19 530 necessary to answer the question of timing and how to measure the outcomes. We will  
20 531 advise on this subject in the final report.  
21  
22  
23  
24  
25  
26  
27  
28  
29  
30  
31  
32  
33  
34  
35  
36  
37  
38  
39  
40  
41  
42  
43  
44  
45  
46  
47  
48  
49  
50  
51  
52  
53  
54  
55  
56  
57  
58  
59  
60

## 533 FOOTNOTES

### 534 **Paediatric appendicitis COS development group.**

535 Minneci PC, MD, Svensson JF, MD, PhD, Luks FI, MD, PhD, St. Peter SD, MD, Abbo O, MD, Arnaud  
536 AP, MD, Adams S, MBBS, FRACS, Nah SA, MBBS, MRCS, Skarsgard ED, MD, Pierro A, MD, PhD,  
537 Zani A, MD, PhD, Emil S, MD, CM, Keijzer R, MD, PhD, Suominen JS, MD, PhD, Aziz DA, MD, FRCS

### 539 **Collaborators:**

540 The pediatric surgery departments of following hospitals have initiated the COS project and will  
541 contribute by recruiting participants. Nationwide Children's Hospital, Columbus, OH, USA. Hasbro  
542 Children's Hospital and Alpert Medical School of Brown University, Providence, RI, USA. Children's  
543 Mercy Hospital, Kansas City, MO, USA. Karolinska University Hospital, Stockholm, Sweden.  
544 Southampton General Hospital, Southampton, UK. Hôpital des Enfants, Centre Hospitalier  
545 Universitaire Toulouse, Toulouse, France. Hôpital Femme-Enfant, University Hospital, CHU Rennes,  
546 Rennes, France. Sydney Children's Hospital, Randwick NSW, Australia. KK Women's and Children's  
547 Hospital, Singapore. BC Children's Hospital, Vancouver, BC, Canada. The Hospital for Sick Children,  
548 Toronto, ON, Canada. Montreal Children's Hospital, Montreal, QC, Canada. Emma Children's  
549 Hospital, Amsterdam UMC, University of Amsterdam, Vrije Universiteit, Amsterdam, Netherlands.  
550 Helsinki Children's Hospital, Helsinki, Finland. Universiti Kebangsaan Malaysia Medical Centre  
551 (UKMMC), Kuala Lumpur, Malaysia.

### 553 **Study management group**

554 Knaapen M, Hall NJ, Van der Lee JH, Butcher NJ, Offringa M, Bakx R, Gorter RR

### 556 **Acknowledgments**

557 We acknowledge Hester Rippen as the representative of the Dutch Foundation Children and Hospital  
558 for her advice and support in drafting the protocol.

### 560 **Author contributions:**

561 All authors have contributed to the design of this protocol. MK, NJH JHvdL, RB and RRG have  
562 initiated the project. The protocol was drafted by MK which was refined by NJH, JHvdL, RB, MO, NJB,  
563 EWEvH, and RRG. Statistical advice was provided by JHvdL. MK was responsible for drafting this  
564 manuscript. All authors have contributed to the manuscript and read and approved the final  
565 manuscript. The paediatric appendicitis COS development group consist of all local investigators who  
566 are responsible for translation, ethical board approval, participant recruitment. They have all read,  
567 refined and approved the final manuscript.

### 569 **Data sharing statement:**

570 The project is registered on the comet-initiative.org which is open access. The study findings will be  
571 presented in a report which will be submitted for publication in a relevant peer-reviewed journal to  
572 ensure dissemination to relevant healthcare professionals. Findings may also be submitted for  
573 presentation at local meetings or conferences. The protocol will be published on an open access  
574 repository.

576 **Funding statement:** This research received no specific grant from any funding agency in the public,  
577 commercial or not-for-profit sectors

578 **Competing interests statement:** None to declare



580 **REFERENCES**

581

582 1 Addiss DG, Shaffer N, Fowler BS, *et al.* the Epidemiology of Appendicitis and  
583 Appendectomy in the United States. *Am J Epidemiol* 1990;**132**:910–25.  
584 doi:10.1093/oxfordjournals.aje.a115734

585 2 Anderson JE, Bickler SW, Chang DC, *et al.* Examining a common disease with  
586 unknown etiology: trends in epidemiology and surgical management of appendicitis in  
587 California, 1995-2009. *World J Surg* 2012;**36**:2787–94. doi:10.1007/s00268-012-1749-  
588 z

589 3 Ferris M, Quan S, Kaplan BS, *et al.* The Global Incidence of Appendicitis. *Ann Surg*  
590 2017;**266**:237–41. doi:10.1097/SLA.0000000000002188

591 4 Georgiou R, Eaton S, Stanton MP, *et al.* Efficacy and Safety of Nonoperative  
592 Treatment for Acute Appendicitis: A Meta-analysis. *Pediatrics* 2017;;e20163003.  
593 doi:10.1542/peds.2016-3003

594 5 Huang L, Yin Y, Yang L, *et al.* Comparison of Antibiotic Therapy and Appendectomy  
595 for Acute Uncomplicated Appendicitis in Children. *JAMA Pediatr* 2017;**171**:426.  
596 doi:10.1001/jamapediatrics.2017.0057

597 6 Xu J, Adams S, Liu YC, *et al.* Nonoperative management in children with early acute  
598 appendicitis: A systematic review. *J Pediatr Surg* Published Online First: May 2017.  
599 doi:10.1016/j.jpedsurg.2017.05.003

600 7 Kessler U, Mosbahi S, Walker B, *et al.* Conservative treatment versus surgery for  
601 uncomplicated appendicitis in children: a systematic review and meta-analysis. *Arch*  
602 *Dis Child* 2017;;archdischild-2017-313127. doi:10.1136/archdischild-2017-313127

603 8 Gorter RR, The S-MML, Gorter-Stam MAW, *et al.* Systematic review of nonoperative  
604 versus operative treatment of uncomplicated appendicitis. *J Pediatr Surg* 2017;**18 Apr**  
605 **201**. doi:10.1016/j.jpedsurg.2017.04.005

606 9 Sinha I, Jones L, Smyth RL, *et al.* A Systematic Review of Studies That Aim to  
607 Determine Which Outcomes to Measure in Clinical Trials in Children. *PLoS Med*  
608 2008;**5**:e96. doi:10.1371/journal.pmed.0050096

609 10 Kirkham JJ, Dwan KM, Altman DG, *et al.* The impact of outcome reporting bias in  
610 randomised controlled trials on a cohort of systematic reviews. *BMJ* 2010;**340**:c365.



- 1  
2  
3 611 11 Pogue J, Yusuf S. Overcoming the limitations of current meta-analysis of randomised  
4 612 controlled trials. *Lancet (London, England)* 1998;**351**:47–52. doi:10.1016/S0140-  
5 613 6736(97)08461-4  
6  
7  
8  
9 614 12 Zanchetti A, Mancia G. Searching for information from unreported trials--amnesty for  
10 615 the past and prospective meta-analyses for the future. *J Hypertens* 1998;**16**:125.  
11  
12  
13 616 13 Hall NJ, Kapadia MZ, Eaton S, *et al.* Outcome reporting in randomised controlled trials  
14 617 and meta-analyses of appendicitis treatments in children: a systematic review. *Trials*  
15 618 2015;**16**:275. doi:10.1186/s13063-015-0783-1  
16  
17  
18 619 14 Clarke M. Standardising outcomes for clinical trials and systematic reviews. *Trials*  
19 620 2007;**8**:39. doi:10.1186/1745-6215-8-39  
20  
21  
22 621 15 Sherratt FC, Eaton S, Walker E, *et al.* Development of a core outcome set to  
23 622 determine the overall treatment success of acute uncomplicated appendicitis in  
24 623 children: a study protocol. *BMJ Paediatr Open* 2017;**1**:e000151. doi:10.1136/bmjpo-  
25 624 2017-000151  
26  
27  
28  
29 625 16 Sanderson T, Morris M, Calnan M, *et al.* What outcomes from pharmacologic  
30 626 treatments are important to people with rheumatoid arthritis? Creating the basis of a  
31 627 patient core set. *Arthritis Care Res (Hoboken)* 2010;**62**:640–6. doi:10.1002/acr.20034  
32  
33  
34  
35 628 17 Kirkham JJ, Davis K, Altman DG, *et al.* Core Outcome Set-STAndards for  
36 629 Development: The COS-STAD recommendations. *PLOS Med* 2017;**14**:e1002447.  
37 630 doi:10.1371/journal.pmed.1002447  
38  
39  
40  
41 631 18 Williamson PR, Altman DG, Bagley H, *et al.* The COMET Handbook: version 1.0.  
42 632 *Trials* 2017;**18**:280. doi:10.1186/s13063-017-1978-4  
43  
44  
45 633 19 Kirkham JJ, Gorst S, Altman DG, *et al.* Core Outcome Set-STAndards for Reporting:  
46 634 The COS-STAR Statement. *PLoS Med* 2016;**13**:e1002148.  
47 635 doi:10.1371/journal.pmed.1002148  
48  
49  
50 636 20 Staniszewska S, Brett J, Simera I, *et al.* GRIPP2 reporting checklists: tools to improve  
51 637 reporting of patient and public involvement in research. *BMJ* 2017;**358**:j3453.  
52  
53  
54 638 21 Protocol for the development of a global core outcome set for treatment of  
55 639 uncomplicated appendicitis in children :: Core Outcome Measures in Effectiveness  
56 640 Trials Initiative (COMET). <http://www.comet-initiative.org/studies/details/1119>  
57 641 (accessed 5 Mar 2018).  
58  
59  
60 642 22 Sinha IP, Smyth RL, Williamson PR. Using the Delphi Technique to Determine Which  
20

- 1  
2  
3 643 Outcomes to Measure in Clinical Trials: Recommendations for the Future Based on a  
4 Systematic Review of Existing Studies. *PLoS Med* 2011;**8**:e1000393.  
5 644  
6 645 doi:10.1371/journal.pmed.1000393  
7  
8  
9 646 23 Liberati A, Altman DG, Tetzlaff J, *et al*. The PRISMA statement for reporting  
10 647 systematic reviews and meta-analyses of studies that evaluate health care  
11 648 interventions: explanation and elaboration. *J Clin Epidemiol* 2009;**62**:e1–34.  
12 649 doi:10.1016/j.jclinepi.2009.06.006  
13  
14  
15  
16 650 24 Boers M, Kirwan JR, Gossec L, *et al*. How to choose core outcome measurement sets  
17 651 for clinical trials: OMERACT 11 approves filter 2.0. *J Rheumatol* 2014;**41**:1025–30.  
18 652 doi:10.3899/jrheum.131314  
19  
20  
21 653 25 Mullen PM. Delphi: myths and reality. *J Health Organ Manag* 2003;**17**:37–52.  
22 654 doi:10.1108/14777260310469319  
23  
24  
25 655 26 Murphy MK, Black NA, Lamping DL, *et al*. Consensus development methods, and their  
26 656 use in clinical guideline development. *Health Technol Assess* 1998;**2**:i–iv, 1–88.  
27  
28  
29 657 27 COMET DelphiManager. 2017.<http://www.comet-initiative.org/delphimanager/>  
30 658 (accessed 4 Dec 2018).  
31  
32  
33 659 28 Guyatt GH, Oxman AD, Kunz R, *et al*. GRADE guidelines: 2. Framing the question  
34 660 and deciding on important outcomes. *J Clin Epidemiol* 2011;**64**:395–400.  
35 661 doi:10.1016/j.jclinepi.2010.09.012  
36  
37  
38  
39 662 29 Brookes ST, Macefield RC, Williamson PR, *et al*. Three nested randomized controlled  
40 663 trials of peer-only or multiple stakeholder group feedback within Delphi surveys during  
41 664 core outcome and information set development. *Trials* 2016;**17**:409.  
42 665 doi:10.1186/s13063-016-1479-x  
43  
44  
45  
46 666 30 Dodd S, Clarke M, Becker L, *et al*. A taxonomy has been developed for outcomes in  
47 667 medical research to help improve knowledge discovery. *J Clin Epidemiol* 2018;**96**:84–  
48 668 92. doi:10.1016/j.jclinepi.2017.12.020  
49  
50  
51  
52 669 31 Biggane AM, Brading L, Ravaud P, *et al*. Survey indicated that core outcome set  
53 670 development is increasingly including patients, being conducted internationally and  
54 671 using Delphi surveys. *Trials* 2018;**19**:113. doi:10.1186/s13063-018-2493-y  
55  
56  
57 672 32 Tsihchaki A, O'Brien K, Johal A, *et al*. Development of a core outcome set for  
58 673 orthodontic trials using a mixed-methods approach: protocol for a multicentre study.  
59 674 *Trials* 2017;**18**:366. doi:10.1186/s13063-017-2098-x  
60

- 1  
2  
3 675 33 Allard A, Fellowes A, Shilling V, *et al.* Key health outcomes for children and young  
4 676 people with neurodisability: qualitative research with young people and parents. *BMJ*  
5 677 *Open* 2014;**4**:e004611. doi:10.1136/bmjopen-2013-004611  
6  
7  
8 678 34 Morris C, Janssens A, Shilling V, *et al.* Meaningful health outcomes for paediatric  
9 679 neurodisability: Stakeholder prioritisation and appropriateness of patient reported  
10 680 outcome measures. *Health Qual Life Outcomes* 2015;**13**:87. doi:10.1186/s12955-015-  
11 681 0284-7  
12  
13  
14  
15  
16 682  
17  
18 683  
19  
20  
21  
22  
23  
24  
25  
26  
27  
28  
29  
30  
31  
32  
33  
34  
35  
36  
37  
38  
39  
40  
41  
42  
43  
44  
45  
46  
47  
48  
49  
50  
51  
52  
53  
54  
55  
56  
57  
58  
59  
60

For peer review only

1  
2  
3  
4  
5  
6  
7  
8  
9  
10  
11  
12  
13  
14  
15  
16  
17  
18  
19  
20  
21  
22  
23  
24  
25  
26  
27  
28  
29  
30  
31  
32  
33  
34  
35  
36  
37  
38  
39  
40  
41  
42  
43  
44  
45  
46  
47  
48  
49  
50  
51  
52  
53  
54  
55  
56  
57  
58  
59  
60

684 **Figures**

685

686 **Figure 1. Schematic depiction of outcome term selection from systematic reviews**

687 *RCTs= Randomized controlled trials. SRs= Systematic reviews*

For peer review only

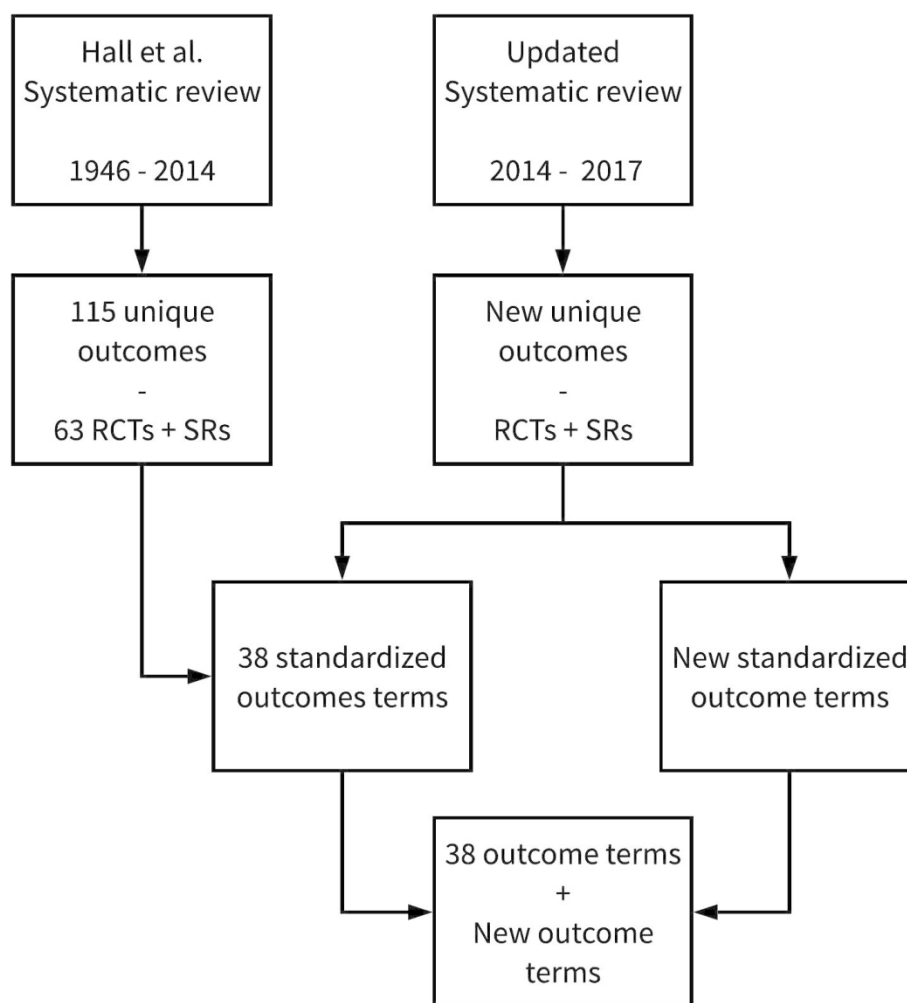

Figure 1. Schematic depiction of outcome term selection from systematic reviews  
RCTs= Randomized controlled trials. SRs= Systematic reviews

134x146mm (300 x 300 DPI)

Online supplement 1.

S1. Completed COS-STAD checklist for PA-COS project

| Domain                | Methodology                                                                                    | Notes                                                                                                                                                                                                                       | Addressed on page number       |
|-----------------------|------------------------------------------------------------------------------------------------|-----------------------------------------------------------------------------------------------------------------------------------------------------------------------------------------------------------------------------|--------------------------------|
| Scope specification   | 1. The research or practice setting(s) in which the COS is to be applied                       | e.g., for application in research studies or for use in routine care                                                                                                                                                        | 4.                             |
|                       | 2. The health condition(s) covered by the COS                                                  | e.g., treatment of rheumatoid arthritis or screening for cancer                                                                                                                                                             | 4.                             |
|                       | 3. The population(s) covered by the COS                                                        | e.g., patients with advanced disease or children                                                                                                                                                                            | 4.                             |
|                       | 4. The intervention(s) covered by the COS                                                      | e.g., all interventions, drug therapy, or surgical interventions                                                                                                                                                            | 4.                             |
| Stakeholders involved | 5. Those who will use the COS in research                                                      | e.g., clinical trialists or industry                                                                                                                                                                                        | 6.                             |
|                       | 6. Healthcare professionals with experience of patients with the condition                     | e.g., clinical experts, practitioners, and investigators with particular experience in the condition                                                                                                                        | 6.                             |
|                       | 7. Patients with the condition or their representatives                                        | involve those who have experienced or who are affected by the condition (e.g., patients, family members, and carers).                                                                                                       | 6.                             |
| Consensus process     | 8. The initial list of outcomes considered both healthcare professionals' and patients' views. | consider the views of healthcare professionals and patients (most likely identified from literature reviews or interviews) when generating an initial list of outcomes for inclusion in the consensus process.              | 5.<br>(No patient involvement) |
|                       | 9. A scoring process and consensus definition were described a priori.                         | Although different consensus methods may be employed in different studies, to avoid any potential biases, COS developers should describe their consensus method a priori.                                                   | 7, 8, 9.                       |
|                       | 10. Criteria for including/dropping/adding                                                     | prespecify criteria for including, dropping, or adding new outcomes to avoid potential biases.                                                                                                                              | 7, 8, 9.                       |
|                       | 11. Care was taken to avoid ambiguity of language used in the list of outcomes.                | consider the language used when describing outcomes in front of different stakeholder groups. An example of 1 approach taken is to include both lay and medical terms, with these previously piloted with the stakeholders. | 7,8.                           |

## 1 Online supplement 2.

### 2 S2. Search strategy for systematic review PA-COS

#### 3 **Appendicitis**

4 "Appendix"[Mesh] OR appendix[tiab] OR appendix[ot] OR "Appendicitis"[Mesh] OR  
5 "Appendectomy"[Mesh] OR appendicit\*[tiab] OR appendicit\*[ot] OR appendectom\*[tiab] OR  
6 appendectom\*[ot] OR appendicectom\*[tiab] OR appendicectom\*[ot]

#### 7 **Children**

8 child\*[tw] OR schoolchild\*[tw] OR infan\*[tw] OR adolescen\*[tw] OR pediatri\*[tw] OR  
9 paediatr\*[tw] OR neonat\*[tw] OR boy[tw] OR boys[tw] OR boyhood[tw] OR girl[tw] OR  
10 girls[tw] OR girlhood[tw] OR youth[tw] OR youths[tw] OR baby[tw] OR babies[tw] OR  
11 toddler\*[tw] OR teen[tw] OR teens[tw] OR teenager\*[tw] OR newborn\*[tw] OR  
12 postneonat\*[tw] OR postnat\*[tw] OR perinat\*[tw] OR puberty[tw] OR preschool\*[tw] OR  
13 suckling\*[tw] OR picu[tw] OR nicu[tw]

#### 14 **3.2.2 Study selection**

15 Selection of studies will be performed by 2 independent reviewers (MK, JF) according to the  
16 below mentioned in- and exclusion criteria. In case of disagreement between two reviewers,  
17 a third independent reviewer (RG) will make the final decision.

##### 18 *Inclusion/Exclusion Criteria:*

19 All RCTs and systematic reviews/meta-analyses reporting the outcome of treatment of acute  
20 uncomplicated appendicitis will be included in this systematic review. By including systematic  
21 reviews that also report on non-comparative studies we expect to identify all reported  
22 treatment outcomes, including those from the relatively new field of non-operative  
23 management of uncomplicated appendicitis. Publications before January 2014 will be  
24 excluded. Only studies in children (<18 years of age) will be included. Studies only reporting  
25 on the outcome of treatment in complex or complicated appendicitis (gangrenous  
26 appendicitis, appendiceal mass, appendiceal abscess) will be excluded.

#### 27 **3.2.3 Data extraction**

28 The two reviewers will extract the data independently using the predefined data extraction  
29 form shown in Appendix A. In case of disagreement a third reviewer will make the final  
30 decision. A risk of bias assessment of the individual studies is not applicable as we will not  
31 be using individual study data but only the reported outcomes. As diversity in terminology will  
32 be anticipated, we decided to initially report all outcome measure as mentioned in the original  
33 study. Outcome measures will be mapped independently by two reviewers and in case of  
34 disagreement a third reviewer will make the final decision. After data extraction of all studies  
35 is completed, a meeting of the study management group will be held between to discuss  
36 potential similarity between the outcome measures in order to assign an appropriate term for  
37 them.
