# Supplementary material for: Establishing a core outcome set for treatment of uncomplicated appendicitis in children: study protocol for an international Delphi survey
Source: PubMed Central journal article supplement (PMC6538019; doi:10.1136/bmjopen-2018-028861), 2019-05-22
Supplement: bmjopen-2018-028861supp001.pdf [file bmjopen-2018-028861supp001.pdf]

## Online supplement 1.

### S1. Completed COS-STAD checklist for PA-COS project

| Domain                | Methodology                                                                                    | Notes                                                                                                                                                                                                                       | Addressed on page number       |
|-----------------------|------------------------------------------------------------------------------------------------|-----------------------------------------------------------------------------------------------------------------------------------------------------------------------------------------------------------------------------|--------------------------------|
| Scope specification   | 1. The research or practice setting(s) in which the COS is to be applied                       | e.g., for application in research studies or for use in routine care                                                                                                                                                        | 4.                             |
|                       | 2. The health condition(s) covered by the COS                                                  | e.g., treatment of rheumatoid arthritis or screening for cancer                                                                                                                                                             | 4.                             |
|                       | 3. The population(s) covered by the COS                                                        | e.g., patients with advanced disease or children                                                                                                                                                                            | 4.                             |
|                       | 4. The intervention(s) covered by the COS                                                      | e.g., all interventions, drug therapy, or surgical interventions                                                                                                                                                            | 4.                             |
| Stakeholders involved | 5. Those who will use the COS in research                                                      | e.g., clinical trialists or industry                                                                                                                                                                                        | 6.                             |
|                       | 6. Healthcare professionals with experience of patients with the condition                     | e.g., clinical experts, practitioners, and investigators with particular experience in the condition                                                                                                                        | 6.                             |
|                       | 7. Patients with the condition or their representatives                                        | involve those who have experienced or who are affected by the condition (e.g., patients, family members, and carers).                                                                                                       | 6.                             |
| Consensus process     | 8. The initial list of outcomes considered both healthcare professionals' and patients' views. | consider the views of healthcare professionals and patients (most likely identified from literature reviews or interviews) when generating an initial list of outcomes for inclusion in the consensus process.              | 5.<br>(No patient involvement) |
|                       | 9. A scoring process and consensus definition were described a priori.                         | Although different consensus methods may be employed in different studies, to avoid any potential biases, COS developers should describe their consensus method a priori.                                                   | 7, 8, 9.                       |
|                       | 10. Criteria for including/dropping/adding                                                     | prespecify criteria for including, dropping, or adding new outcomes to avoid potential biases.                                                                                                                              | 7, 8, 9.                       |
|                       | 11. Care was taken to avoid ambiguity of language used in the list of outcomes.                | consider the language used when describing outcomes in front of different stakeholder groups. An example of 1 approach taken is to include both lay and medical terms, with these previously piloted with the stakeholders. | 7,8.                           |
